## 1 Medication-related adverse events in patients with cancer and discrepancies in cystatin 2 C- versus creatinine-based eGFR

3  
4 Paul E. Hanna, MD MSc<sup>1\*</sup>, Qiyu Wang, MD<sup>1\*</sup>, Ian Strohbehm, BA<sup>1</sup>, Daiana Moreno, BS<sup>1</sup>, Destiny  
5 Harden, BA<sup>1</sup>, Tianqi Ouyang, MPH<sup>1</sup>, Nurit Katz-Agranov, MD<sup>1</sup>, Harish Seethapathy MBBS<sup>1</sup>,  
6 Kerry L. Reynolds MD<sup>2</sup>, Shruti Gupta, MD MPH<sup>3-4</sup>, David E. Leaf MD MMSc<sup>3</sup>, Meghan E. Sise,  
7 MD MS<sup>1</sup>

- 8  
9 1. Division of Nephrology, Department of Medicine, Massachusetts General Hospital,  
10 Boston, MA  
11 2. Division of Hematology and Oncology, Department of Medicine, Massachusetts  
12 General Hospital, Boston, MA  
13 3. Division of Renal Medicine, Brigham and Women's Hospital, Boston, MA  
14 4. Adult Survivorship Program, Dana-Farber Cancer Institute, Boston, MA

15  
16 \*Equal contribution

17  
18 Corresponding Author:  
19 Meghan Sise, MD, MS  
20 165 Cambridge St. Suite 302  
21 Boston, MA 02108  
22 [msise@partners.org](mailto:msise@partners.org)  
23 617-726-5050  
24

### 25 Abstract

26 **Background:** Creatinine-based estimated glomerular filtration rate (eGFR<sub>CRE</sub>) may overestimate  
27 kidney function in patients with cancer. Cystatin C-based eGFR (eGFR<sub>CYS</sub>) is an alternative  
28 marker of kidney function. We investigated whether patients with an eGFR discrepancy, defined  
29 as eGFR<sub>CYS</sub> >30% lower than the concurrent eGFR<sub>CRE</sub>, had an increased risk of adverse events  
30 resulting from renally-cleared medications.

31 **Patients and Methods:** We conducted a cohort study of adult patients with cancer who had  
32 serum creatinine and cystatin C measured on the same day between May 2010 and January  
33 2022 at two academic cancer centers in Boston, MA. The primary outcome was the incidence of  
34 each of the following medication-related adverse events: 1) supratherapeutic vancomycin levels  
35 (>30µg/mL); 2) trimethoprim-sulfamethoxazole-related hyperkalemia (>5.5mEq/L); 3) baclofen-  
36 induced neurotoxicity; and 4) supratherapeutic digoxin levels (>2.0ng/mL).

37 **Results:** 1988 patients with cancer had simultaneous eGFR<sub>CYS</sub> and eGFR<sub>CRE</sub>. The mean age  
38 was 66 years (SD±14), 965 (49%) were female, and 1555 (78%) were non-Hispanic white.

39 eGFR discrepancy occurred in 579 patients (29%). Patients with eGFR discrepancy were more  
40 likely to experience medication-related adverse events compared to those without eGFR  
41 discrepancy: vancomycin levels  $>30\mu\text{g/mL}$  (24% vs. 10%,  $p=0.004$ ), trimethoprim-  
42 sulfamethoxazole-related hyperkalemia (24% vs. 12%,  $p=0.013$ ), baclofen-induced neurotoxicity  
43 (25% vs. 0%,  $p=0.13$ ), and supratherapeutic digoxin levels (38% vs. 0%,  $p=0.03$ ). The adjusted  
44 OR for vancomycin levels  $>30\mu\text{g/mL}$  was 2.30 (95% CI 1.05 – 5.51,  $p = 0.047$ ).

45 **Conclusion:** Among patients with cancer with simultaneous assessment of eGFR<sub>CYS</sub> and  
46 eGFR<sub>CRE</sub>, medication-related adverse events occur more commonly in those with eGFR  
47 discrepancy. These findings underscore the importance of accurate assessment of kidney  
48 function and appropriate dosing of renally-cleared medications in patients with cancer.

49

50 Conflicts of interest:

51 S. Gupta reports research support from BTG International and GE Healthcare. She is a  
52 member of GlaxoSmithKline's Global Anemia Council, a consultant for Secretome, and  
53 president and founder of the American Society of Onconephrology. MES: Reports  
54 research funding from Gilead, Merck, EMD Serono, and Angion. She has served as a  
55 scientific advisory board member to Mallinckrodt, Travere, and Novartis. DEL reports  
56 research support from BioPorto, BTG International, and Metro International Biotech  
57 LLC. All remaining authors have no conflict of interest.

58

59 Disclaimers:

60 The results presented in this report have been presented at the American Society of  
61 Onconephrology Symposium in a poster format, however they have not been published  
62 previously in whole or part.

63

64 Running title: eGFR discrepancies in patients with cancer

65

66 Funding:

67 MES is funded by NIH grant R01DK130839

68 SG is funded by NIH grant K23DK125672

69 DEL is funded by NIH grants R01HL144566, R01DK125786, and R01DK126685

70

71 **Introduction:**

72  
73 Accurate assessment of estimated glomerular filtration rate (eGFR) is key to dosing  
74 renally-cleared medications. While the gold standard method for evaluating kidney function is  
75 direct measurement of glomerular filtration rate (mGFR) using inulin or chromium-51 labeled  
76 ethylenediamine tetra-acetic acid,<sup>1</sup> GFR estimation using serum creatinine is the most  
77 commonly used method in both clinical practice and research.<sup>2-4</sup> Creatinine is a byproduct of  
78 muscle metabolism that is filtered and secreted by the kidneys. Despite continued  
79 improvements of currently available eGFR equations, creatinine-based eGFR remains  
80 imprecise and can overestimate kidney function, particularly in patients with sarcopenia.<sup>5, 6</sup> This  
81 can lead to inaccurate dosing of medications that require adjustment based on eGFR, such as  
82 commonly used antibiotics, muscle relaxants, anti-epileptic drugs, blood thinners, and  
83 antiarrhythmic medications.

84 Cystatin C is a low molecular weight (13K Dalton) protein produced by all nucleated  
85 cells. It is freely filtered by the glomerulus and does not undergo reabsorption or secretion.<sup>7</sup>  
86 Unlike creatinine, cystatin C is not readily affected by age, sex, muscle mass, or diet, and has  
87 been increasingly used as an alternative to creatinine to estimate GFR.<sup>2, 5, 8</sup> A recent, large  
88 study in patients with solid tumors demonstrated that using an equation that combines both  
89 creatinine and cystatin C is the most accurate way to estimate GFR.<sup>8, 9</sup>

90 Because cancer is a significant risk factor for sarcopenia,<sup>10</sup> we hypothesized that having  
91 a cystatin C-based eGFR (eGFR<sub>CYS</sub>) that is significantly lower than creatinine-based eGFR  
92 (eGFR<sub>CRE</sub>) would be common in patients with cancer. Given that patients with cancer are  
93 commonly exposed to numerous medications that require dose adjustment by kidney function,  
94 we hypothesized that adverse events related to renally-cleared medications would be higher in  
95 patients with a large discrepancy between eGFR<sub>CYS</sub> versus eGFR<sub>CRE</sub>.

96

97 **Methods:**

98 *Patient population*

99 Using Mass General Brigham's centralized data warehouse, the Research Patient Data  
100 Registry (RPDR)<sup>11, 12</sup>, we identified adult patients with a pre-existing diagnosis of malignancy  
101 who had both serum creatinine and cystatin C measurements on the same day between May  
102 2010 and January 2022. eGFR<sub>CRE</sub> was calculated using the CKD Epidemiology Collaboration  
103 (CKD-EPI) 2021 race-free equation,<sup>5</sup> while eGFR<sub>CYS</sub> was calculated using the CKD  
104 Epidemiology Collaboration (CKD-EPI) 2012 race-free equation.<sup>13, 14</sup>

105

106 *Data collection*

107 The date of the first simultaneous eGFR<sub>CRE</sub> and eGFR<sub>CYS</sub> measurement was considered  
108 the baseline date. Comorbidities were defined based on diagnosis codes appearing any time  
109 prior to the baseline date, and concurrent medication use was defined by active prescription  
110 within 1 year prior to the baseline date. Cancer type was determined by the most frequently  
111 used cancer-related diagnosis code prior to the baseline. Baseline chronic kidney disease was  
112 defined by the 2021 race free CKD-EPI equation that incorporates both serum creatinine and  
113 cystatin C<sup>8</sup>, and chronic kidney disease was staged per Kidney Disease Improving Global  
114 Outcomes (KDIGO) guidelines.<sup>15</sup> Clinical diagnoses of medication adverse events were  
115 determined by manual chart review by two investigators; with a third available to resolve  
116 disagreement.

117

118 *Primary exposure*

119 The primary exposure was eGFR discrepancy, defined as eGFR<sub>CYS</sub> more than 30%  
120 lower than the eGFR<sub>CRE</sub>; the reference group consisted of all other patients and included  
121 patients whose eGFR<sub>CYS</sub> was more than 30% greater than eGFR<sub>CRE</sub> as this would not place  
122 patients at risk factor for adverse medication side effects from renally-cleared medications. The

123 30% cut-off was chosen because it is commonly used in clinical studies to define the accuracy  
124 of eGFR from measured GFR.<sup>9, 16</sup> We additionally identified a subset of patients with severe  
125 eGFR discrepancy, defined as eGFR<sub>CYS</sub> more than 50% lower than eGFR<sub>CRE</sub> and eGFR<sub>CYS</sub> less  
126 than 30 mL/min/1.73m<sup>2</sup>.

127

### 128 *Primary outcome: Adverse events related to renally-cleared medications*

129 We examined the risk of selected medication adverse events using detailed chart  
130 review. We selected medications (intravenous vancomycin, trimethoprim-sulfamethoxazole,  
131 baclofen, and digoxin) that are typically dose-adjusted based on eGFR and whose side effects  
132 could be quantified by drug level monitoring, laboratory abnormalities, or identified by chart  
133 review. In all cases, we evaluated drug exposures that occurred within 90 days of the baseline  
134 date.

135 The therapeutic range for a vancomycin trough level is 15-20µg/mL and levels greater  
136 than 20µg/mL are considered supratherapeutic<sup>17, 18</sup>. We defined severely elevated vancomycin  
137 trough levels as those greater than >30 µg/mL and used manual chart review to exclude peak  
138 values.<sup>19-21</sup>

139 Trimethoprim-sulfamethoxazole-related hyperkalemia was defined as a serum  
140 potassium level >5.5mEq/L (Common Terminology Criteria for Adverse events [CTCAE v 4.0]  
141 grade 2), and severe hyperkalemia was defined as a level >6.0mEq/L (grade 3) within 30 days  
142 of starting trimethoprim-sulfamethoxazole. As a sensitivity analysis, we determined the average  
143 rise in potassium after initiation of trimethoprim-sulfamethoxazole and the rate of an absolute  
144 increase in serum potassium ≥0.5mEq/L from baseline.

145 Baclofen toxicity was determined by chart review. Baclofen toxicity was defined as  
146 altered mental status, myoclonus, seizure, or orthostatic hypotension/dizziness warranting

147 discontinuation of the medication.<sup>22, 23</sup> An investigator blinded to cystatin C values evaluated all  
148 clinical documentation within 90 days of baseline to identify potential cases of baclofen toxicity.

149         Digoxin toxicity was determined by chart review. An investigator blinded to cystatin C  
150 values evaluated all clinical documentation and digoxin levels obtained within 90 days of  
151 baseline. Digoxin toxicity was defined as altered mental status, nausea, orthostatic hypotension,  
152 or bradycardia attributed to digoxin by the treating team, with a corresponding digoxin trough  
153 level above the therapeutic range.<sup>24, 25</sup>

154

#### 155 *Secondary outcomes*

156         We evaluated eGFR discrepancy and severe eGFR discrepancy as dependent variables  
157 and determined which baseline characteristics and laboratory studies were associated with  
158 eGFR discrepancy.

159         We evaluated the effect of eGFR discrepancy on 30-day mortality. Date of simultaneous  
160 eGFR<sub>CRE</sub> and eGFR<sub>CYS</sub> served as day 0. Patients lost to follow-up within 30 days were censored  
161 at their last visit.

162

#### 163 *Statistical Analysis*

164         We reported baseline characteristics using counts and percentages for categorical  
165 variables and means and standard deviations (SD) for normally distributed continuous variables,  
166 and median and interquartile range for skewed variables. Logistic regression models were used  
167 to examine the association between baseline demographics, comorbidities, medications,  
168 laboratory studies, and eGFR discrepancy in a univariable model. Serum albumin and  
169 hemoglobin were evaluated in clinically relevant categories shown in **Table 1**. Variables were  
170 then selected based on clinical plausibility and information criteria (Akaike and Bayesian) to  
171 generate the final multivariable model. The Wald Chi-squared test was used to assess the  
172 significance of explanatory variables. The final model was adjusted for age, sex, race, eGFR<sub>CRE</sub>.

173 cys, BMI, smoking, hypertension, coronary artery disease, diabetes, cirrhosis, malnutrition,  
174 thyroid disease, proton pump inhibitor use, diuretic use, angiotensin converting enzyme inhibitor  
175 or angiotensin receptor blocker use, corticosteroid use, serum albumin, and hemoglobin,  
176 Chi-squared or Fisher's exact tests were used to assess differences in the rate of  
177 medication adverse events across groups, as appropriate. As a sensitivity analysis, we  
178 performed univariable and multivariable logistic regression to predict the odds of elevated  
179 vancomycin level >30 µg/mL; the final multivariable model was adjusted for age, sex, race,  
180 baseline eGFR<sub>CRE-CYS</sub>, BMI, diabetes, and corticosteroid use. All comparisons were two-sided,  
181 with p<0.05 considered significant. Kaplan-Meier survival curves and multivariable Cox  
182 regression models were used to compare 30-day survival across groups. The final multivariable  
183 model was adjusted for age, sex, race, baseline eGFR<sub>CRE-CYS</sub>, BMI, coronary artery disease,  
184 diabetes, cirrhosis, angiotensin converting enzyme inhibitor or angiotensin receptor blocker use,  
185 proton pump inhibitor use, diuretic use, corticosteroid use, serum albumin, and hemoglobin  
186 level. All analyses were performed using R 4.1.1 (R Foundation), SAS 9.4 (SAS Institute), and  
187 GraphPad PRISM V.9.1.0 (GraphPad Software).

188

189 Informed Consent:

190 The Massachusetts General Brigham Institutional Review Board approved this retrospective  
191 study and waived the need for informed consent.

192 **Results:**

193 *Baseline characteristics*

194 There were 1988 patients with cancer who had a simultaneous creatinine and cystatin C  
195 measured between May 4<sup>th</sup>, 2010, and January 26<sup>th</sup>, 2022 (**Figure 1**). Mean age was 66 (SD 14  
196 years), 965 (49%) were female, and 1555 (78%) were non-Hispanic white. Patients with a wide  
197 array of cancer types were included (**Supplemental Table 1**).

198 A total of 579 patients (29%) had an eGFR<sub>CYS</sub> more than 30% lower than eGFR<sub>CRE</sub>. A  
199 scatterplot of eGFR<sub>CRE</sub> vs. eGFR<sub>CYS</sub> is shown in **Supplemental Figure 1A** and the distribution  
200 of the differences between eGFR<sub>CRE</sub> and eGFR<sub>CYS</sub> is shown in **Supplemental Figure 1B**. As  
201 noted in the methods, the reference group included patients whose eGFR<sub>CYS</sub> was within 30% of  
202 the eGFR<sub>CRE</sub>, as well as the 209 patients (10.5%) whose eGFR<sub>CYS</sub> was 30% higher than  
203 eGFR<sub>CRE</sub>. Predictors of eGFR discrepancy in the multivariable logistic model included white race  
204 (adjusted odds ratio [aOR] 1.54, 95% confidence interval [CI] 1.16–2.045, obesity with body-  
205 mass-index (BMI)  $\geq 30$  vs. normal BMI 18.5-24.9 kg/m<sup>2</sup> (aOR 1.51, 95% CI 1.07–2.13), cirrhosis  
206 (aOR 1.82, 95% CI 1.14–2.95), diuretic use (aOR 1.68, 95% CI 1.23–2.30), recent corticosteroid  
207 use (aOR 1.70, 95% CI 1.28–2.24), hypoalbuminemia (aOR 5.48, 95% CI 3.84–7.86 for serum  
208 albumin  $< 3.0$  vs.  $\geq 4.0$  g/dL), and anemia (aOR 2.17, 95% CI 1.55–3.03 for hemoglobin  $< 10.0$   
209 vs.  $\geq 12.0$  g/dL) (**Figure 2, Supplemental Table 2**).

210 Hypoalbuminemia and anemia were the baseline factors most strongly associated with  
211 having an eGFR discrepancy; there was a stepwise increase in the likelihood of eGFR  
212 discrepancy as albumin and hemoglobin levels decreased (**Figure 3, Supplemental Figure 2**).  
213 Among patients with albumin  $\geq 4.0$  g/dL only 174/1224 (14%) had an eGFR discrepancy,  
214 compared to 198/297 (67%) in patients with albumin  $< 3.0$  g/dL. Among patients with  
215 hemoglobin  $\geq 12$  g/dL only 117/886 (13%) had an eGFR discrepancy, compared to 130/196  
216 (66%) in patients with hemoglobin  $< 8.0$  g/dL.



217           There were 139 patients (7.0% of the overall cohort) who had severe eGFR discrepancy  
218 (eGFR<sub>CYS</sub> > 50% lower than eGFR<sub>CRE</sub> and eGFR<sub>CYS</sub> < 30mL/min/1.73m<sup>2</sup>) (**Supplemental Table**  
219 **3**). Predictors of severe eGFR discrepancy were similar to eGFR discrepancy and are shown in  
220 **Supplemental Table 4**. The rate of eGFR discrepancy and severe eGFR discrepancy varied by  
221 cancer type (**Supplemental Figure 3**).

222

### 223 *Medication-related Adverse Events*

#### 224 *Vancomycin*

225           There were 447 patients who received vancomycin within 90 days of the baseline date,  
226 of whom 286 (64%) had a vancomycin trough measured (**Figure 1**). Patients with eGFR  
227 discrepancy were more likely to have significantly elevated vancomycin trough levels than the  
228 reference group: 129 of 193 (67%) vs. 37 of 93 (40%) of the reference group had a vancomycin  
229 level above the therapeutic range ( $P < 0.001$ ); 46 of 193 (24%) vs. 9 of 93 (10%) had trough  
230 level >30 µcg/mL ( $P = 0.004$ ); 15 of 193 (8%) vs. 0 of 93 (0%) had a trough level >40 µcg/mL ( $P$   
231 = 0.003) (**Figure 4A**). The rate of elevated vancomycin trough levels was even higher in  
232 patients with severe eGFR discrepancy (**Figure 4A**). After adjustment for baseline  
233 demographics, comorbidities, and baseline laboratory studies, patients with eGFR discrepancy  
234 had a 2.30-fold adjusted OR (95% CI 1.05 – 5.51) of having a significantly elevated vancomycin  
235 trough level >30 µg/mL (**Supplemental Table 5**).

236

#### 237 *Trimethoprim-sulfamethoxazole*

238           There were 280 patients who received trimethoprim-sulfamethoxazole within 90 days of  
239 the baseline date. We excluded 30 (11%) who did not have a serum potassium level checked  
240 within 30 days of starting trimethoprim-sulfamethoxazole (**Figure 1**). Patients with eGFR  
241 discrepancy were more likely to experience hyperkalemia (potassium >5.5mEq/L) after starting

242 trimethoprim-sulfamethoxazole compared to the reference group 33 of 135 (24%) vs. 14 of 115  
243 (12%),  $P = 0.013$  (**Figure 4B**). The rate of trimethoprim-sulfamethoxazole-related hyperkalemia  
244 was even greater in patients with severe eGFR discrepancy, affecting 15 of 45 (33%) of patients  
245 ( $P = 0.0018$ ) (**Figure 4B**). A similar trend was found when evaluating the rate of grade 3  
246 hyperkalemia (defined by a potassium level  $> 6.0\text{mEq}$ ) (**Figure 4B**).

247

#### 248 *Baclofen*

249 There were 32 patients newly prescribed baclofen within 90 days of baseline (**Figure 1**).  
250 Five of the 20 patients (25%) with eGFR discrepancy developed clinical evidence of baclofen  
251 toxicity which prompted discontinuation of the medication compared to none of the 12 patients  
252 in the reference group ( $P = 0.13$ ) (**Figure 5A**). Among those with severe eGFR discrepancy, 3  
253 out of 8 (37.5%) developed baclofen toxicity. The most common symptom of baclofen toxicity  
254 was somnolence/depressed level of consciousness (3 cases). Two additional patients  
255 developed severe orthostatic hypotension.

256

#### 257 *Digoxin*

258 There were 102 patients who were prescribed digoxin (**Figure 1**), of whom 34 (33%) had  
259 at least one digoxin level measured. Out of the 24 patients with eGFR discrepancy, 9 patients  
260 (38%) had a digoxin trough level above the therapeutic range ( $>2.0\text{ ng/mL}$ ) compared to none of  
261 the 10 patients in the reference group ( $P = 0.034$ ). Two patients (8.3%) were diagnosed with  
262 clinical digoxin toxicity, including one who required digoxin immune fab (**Supplemental Table**  
263 **6**); both patients diagnosed with clinical digoxin toxicity met criteria for severe eGFR  
264 discrepancy (**Figure 5B**).

265

266 Thirty-day survival

267           132 patients (7%) died within 30 days and 173 (9%) were lost to follow-up prior to 30  
268 days. There was significantly higher 30-day mortality in patients with eGFR discrepancy  
269 compared to the reference group (**Figure 6**). Even after adjustment for age, sex, race, baseline  
270 comorbidities, laboratory tests, and medication use, patients with eGFR discrepancy had a 1.97-  
271 fold increased hazard of death (95% CI 1.29–3.01), compared to the reference group (**Figure 6,**  
272 **Supplemental Table 7**).

273

274

275 **Discussion:**

276 Our study showed that in a cohort of patients with a history of cancer who have  
277 concurrent creatinine and cystatin C measurement, almost 1 out of 3 had an  $eGFR_{CYS}$  more  
278 than 30% lower than  $eGFR_{CRE}$ . The high rate of eGFR discrepancy in patients with cancer  
279 poses a challenge for clinical decision making and signifies an important knowledge gap in  
280 appropriate dose adjustment of medications that primarily undergo renal clearance. We found a  
281 considerably higher rate of adverse events associated with select renally-cleared medications in  
282 patients with eGFR discrepancy compared to our reference group.

283 Accurate dosing of renally-cleared medications is a challenge in patients with cancer,  
284 among whom sarcopenia is common and overestimation of GFR by creatinine-based equations  
285 has been a major concern in clinical practice.<sup>10, 26-28</sup> Cystatin C, which is produced by all  
286 nucleated cells and is not dependent on diet or muscle mass, has been validated as an  
287 alternative marker to estimate kidney function. However, Cystatin C levels may be falsely  
288 increased in patients with obesity, inflammation, current smoking, and corticosteroid therapy.<sup>29-32</sup>  
289 In 2021, the National Kidney Foundation and the American Society of Nephrology Task Force  
290 recommended that clinicians estimate GFR using a combined equation incorporating both  
291 cystatin C and serum creatinine.<sup>33</sup> A recent study of 1200 patients with solid tumors who  
292 underwent measured GFR found that  $eGFR_{CRE}$  overestimated measured GFR,  $eGFR_{CYS}$   
293 underestimated measured GFR, and that the most accurate and precise eGFR was obtained  
294 using the combined equation incorporating both cystatin C and serum creatinine.<sup>9</sup> We note that  
295 risk factors for eGFR underestimation with cystatin C is greater in patients with higher BMI,  
296 current and former smokers, low albumin, higher C-reactive protein, and metastatic disease. It is  
297 important to note the overlap with the predictors of eGFR discrepancy we identified in this study.  
298 Because we lacked measured GFR, we are unable to determine the accuracy of  $eGFR_{CRE}$  and  
299  $eGFR_{CYS}$ , however, we found that when a large eGFR discrepancy exists, patients with cancer  
300 are at higher risk of adverse events from renally-cleared medications.

301 Our study demonstrated a higher rate of suprathreshold vancomycin levels in patients  
302 with eGFR discrepancy. Vancomycin is a very commonly used intravenous antibiotic in  
303 hospitalized patients that is predominantly eliminated by the kidney (>90%). Several studies  
304 have demonstrated that vancomycin clearance and target trough achievement may be more  
305 accurately predicted by eGFR<sub>CYS</sub> than eGFR<sub>CRE</sub>.<sup>34-38</sup> A previously published quality improvement  
306 initiative that included 399 patients found that a vancomycin dosing algorithm using eGFR  
307 estimated by both creatinine and cystatin C (N = 135) was more likely to achieve therapeutic  
308 vancomycin trough levels (50% vs. 28%, p< 0.001) compared to an algorithm using eGFR<sub>CRE</sub>  
309 alone (N = 264).<sup>36</sup> Trimethoprim-sulfamethoxazole is another commonly used antibiotic in the  
310 inpatient and outpatient setting. Trimethoprim can have an “amiloride-like” effect by inhibiting  
311 potassium secretion in the distal convoluted tubule; patients with impaired kidney function are  
312 much more likely to develop clinically significant hyperkalemia when treated with trimethoprim-  
313 sulfamethoxazole.<sup>39</sup> Hyperkalemia occurred more commonly in patients with eGFR discrepancy  
314 compared to the reference group. Digoxin is a cardiac glycoside medication approved to treat  
315 atrial fibrillation and congestive heart failure that has a narrow therapeutic index. Digoxin is  
316 cleared by the kidneys and its toxicity is dose dependent. There have been conflicting reports  
317 regarding use of creatinine versus cystatin C to predict digoxin clearance.<sup>40-44</sup> Here, we found  
318 that patients with eGFR discrepancy were significantly more likely to have suprathreshold  
319 digoxin trough levels compared to the reference group, and both cases of symptomatic digoxin  
320 toxicity occurred in patients with eGFR discrepancy. Baclofen is a muscle relaxant that is  
321 commonly prescribed in patients with cancer to inhibit the hiccup reflex. Baclofen is primarily  
322 eliminated by the kidney. In patients with impaired kidney function, baclofen accumulation can  
323 occur after just a single dose, and can lead to profound central nervous system suppression,  
324 ranging from encephalopathy, coma, areflexia, hypotension, and cardiac arrest.<sup>45, 46</sup> Our study  
325 showed that symptomatic baclofen toxicity is common in patients with eGFR discrepancy  
326 (affecting 25% of patients), whereas no events occurred in the reference group, suggesting that

327 the eGFR<sub>CYS</sub> should be considered when prescribing baclofen to patients with cancer. To the  
328 best of our knowledge, this is the first study to evaluate eGFR<sub>CYS</sub> and eGFR<sub>CRE</sub> in patients  
329 receiving baclofen. Taken together, our findings suggest that relying on creatinine-based eGFR  
330 alone for medication dosing may be inadequate in patients with cancer and highlights the need  
331 to consider eGFR<sub>CYS</sub> as well.

332 Finally, consistent with prior knowledge that incorporation of cystatin C adds precision to  
333 the eGFR equation in patients with malnutrition, sarcopenia, and cirrhosis,<sup>9, 47, 48</sup> we note that  
334 hypoalbuminemia and anemia are important predictors of eGFR discrepancy in patients with  
335 cancer. It is likely that these laboratory abnormalities that signify chronic illness are associated  
336 with cancer-related sarcopenia. Future prospective studies that include measured GFR are  
337 needed to validate this finding. In addition, we found that eGFR discrepancy is associated with  
338 significantly higher 30-day mortality even after adjustment for demographics, comorbidities,  
339 baseline laboratory studies, and medication use. Although higher serum creatinine and cystatin  
340 C have each been shown to be associated with increased mortality in multiple clinical  
341 settings,<sup>49-54</sup> our finding suggests that discrepancy between creatinine and cystatin C, in addition  
342 to the absolute values of either marker, adds further information and potentially serves as an  
343 independent predictor of death.

344 Our study has several limitations. First, cystatin C was only available on select patients,  
345 where it has been ordered as a part of routine care. Since cystatin C is not routinely used in  
346 clinical practice, our population was likely enriched for patients in whom clinicians suspected an  
347 eGFR discrepancy or kidney injury might exist, this likely an overestimate of the rate of eGFR  
348 discrepancy in the oncology population in general. However, the selection bias should be  
349 balanced between the eGFR discrepancy group and the reference group, which preserves the  
350 validity of comparison of medication-related adverse events between the two groups. Second,  
351 we only used a one-time assessment of creatinine and cystatin C, which may not reflect a  
352 steady state at the time of measurement. Third, we were not able to determine cancer stage

353 from our dataset, which may be an important non-GFR determinant of cystatin C and  
354 creatinine.<sup>55, 56</sup> Fourth, it is possible that clinician knowledge of the eGFR<sub>CYS</sub> could have  
355 influenced medication dosing; however, such practice would have biased our results toward the  
356 null. Accordingly, the magnitude of association between eGFR discrepancy and medication-  
357 related adverse events that we report here is likely an underestimate. Finally, our study lacks  
358 gold standard GFR measurement given the retrospective design; however, comparing adverse  
359 outcomes of renally-dosed medications serves as surrogate marker for accuracy of eGFR.

360 In conclusion, we found that a >30% eGFR discrepancy is common in patients with  
361 cancer and is associated with an increase in adverse events related to commonly used, renally-  
362 cleared medications. Future prospective studies are needed to improve and personalize the  
363 approach to GFR estimation and medication dosing in patients with cancer.

364 **References:**

- 365
- 366 1. Soveri I, Berg UB, Bjork J, Elinder CG, Grubb A, Mejare I, Sterner G, Back SE, Group SGR.  
367 Measuring GFR: a systematic review. *Am J Kidney Dis.* 2014;64(3):411-24. Epub 20140517. doi:  
368 10.1053/j.ajkd.2014.04.010. PubMed PMID: 24840668.
  - 369 2. Levey AS, Bosch JP, Lewis JB, Greene T, Rogers N, Roth D. A more accurate method to  
370 estimate glomerular filtration rate from serum creatinine: a new prediction equation.  
371 Modification of Diet in Renal Disease Study Group. *Ann Intern Med.* 1999;130(6):461-70. doi:  
372 10.7326/0003-4819-130-6-199903160-00002. PubMed PMID: 10075613.
  - 373 3. Levey AS, Coresh J, Greene T, Stevens LA, Zhang YL, Hendriksen S, Kusek JW, Van Lente  
374 F, Chronic Kidney Disease Epidemiology C. Using standardized serum creatinine values in the  
375 modification of diet in renal disease study equation for estimating glomerular filtration rate.  
376 *Ann Intern Med.* 2006;145(4):247-54. doi: 10.7326/0003-4819-145-4-200608150-00004.  
377 PubMed PMID: 16908915.
  - 378 4. Cockcroft DW, Gault MH. Prediction of creatinine clearance from serum creatinine.  
379 *Nephron.* 1976;16(1):31-41. doi: 10.1159/000180580. PubMed PMID: 1244564.
  - 380 5. Inker LA, Eneanya ND, Coresh J, Tighiouart H, Wang D, Sang Y, Crews DC, Doria A,  
381 Estrella MM, Froissart M, Grams ME, Greene T, Grubb A, Gudnason V, Gutierrez OM, Kalil R,  
382 Karger AB, Mauer M, Navis G, Nelson RG, Poggio ED, Rodby R, Rossing P, Rule AD, Selvin E,  
383 Seegmiller JC, Shlipak MG, Torres VE, Yang W, Ballew SH, Couture SJ, Powe NR, Levey AS,  
384 Chronic Kidney Disease Epidemiology C. New Creatinine- and Cystatin C-Based Equations to  
385 Estimate GFR without Race. *N Engl J Med.* 2021;385(19):1737-49. Epub 20210923. doi:  
386 10.1056/NEJMoa2102953. PubMed PMID: 34554658; PMCID: PMC8822996.
  - 387 6. Shafi T, Zhu X, Lirette ST, Rule AD, Mosley T, Butler KR, Hall ME, Vaitla P, Wynn JJ, Tio  
388 MC, Dossabhoy NR, Guallar E, Butler J. Quantifying Individual-Level Inaccuracy in Glomerular  
389 Filtration Rate Estimation : A Cross-Sectional Study. *Ann Intern Med.* 2022;175(8):1073-82.  
390 Epub 20220705. doi: 10.7326/M22-0610. PubMed PMID: 35785532.
  - 391 7. Stevens LA, Schmid CH, Greene T, Li L, Beck GJ, Joffe MM, Froissart M, Kusek JW, Zhang  
392 YL, Coresh J, Levey AS. Factors other than glomerular filtration rate affect serum cystatin C  
393 levels. *Kidney Int.* 2009;75(6):652-60. Epub 20081231. doi: 10.1038/ki.2008.638. PubMed  
394 PMID: 19119287; PMCID: PMC4557800.
  - 395 8. Inker LA, Schmid CH, Tighiouart H, Eckfeldt JH, Feldman HI, Greene T, Kusek JW, Manzi J,  
396 Van Lente F, Zhang YL, Coresh J, Levey AS, Investigators C-E. Estimating glomerular filtration  
397 rate from serum creatinine and cystatin C. *N Engl J Med.* 2012;367(1):20-9. doi:  
398 10.1056/NEJMoa1114248. PubMed PMID: 22762315; PMCID: PMC4398023.
  - 399 9. Costa ESVT, Gil LA, Jr., Inker LA, Caires RA, Costalonga E, Coura-Filho G, Sapienza MT,  
400 Castro G, Jr., Estevez-Diz MD, Zanetta DMT, Antonangelo L, Marcal L, Tighiouart H, Miao S,  
401 Mathew P, Levey AS, Burdmann EA. A prospective cross-sectional study estimated glomerular  
402 filtration rate from creatinine and cystatin C in adults with solid tumors. *Kidney Int.*  
403 2022;101(3):607-14. Epub 20220112. doi: 10.1016/j.kint.2021.12.010. PubMed PMID:  
404 35032521.
  - 405 10. Williams GR, Dunne RF, Giri S, Shachar SS, Caan BJ. Sarcopenia in the Older Adult With  
406 Cancer. *J Clin Oncol.* 2021;39(19):2068-78. Epub 2021/05/28. doi: 10.1200/jco.21.00102.  
407 PubMed PMID: 34043430; PMCID: PMC8260902 DunneConsulting or Advisory Role: Exelixis



- 408 Smith GiriHonoraria: CareVive, OncliveResearch Funding: Carevive Systems, Pack Health  
409 Shlomit S. ShacharConsulting or Advisory Role: Novartis, Roche, Pfizer, LillyTravel,  
410 Accommodations, Expenses: Pfizer, RocheNo other potential conflicts of interest were  
411 reported.
- 412 11. Chute DF, Zhao S, Strohbehn IA, Rusibamayila N, Seethapathy H, Lee M, Zubiri L, Gupta  
413 S, Leaf DE, Rahma O, Drobni ZD, Neilan TG, Reynolds KL, Sise ME. Incidence and Predictors of  
414 CKD and Estimated GFR Decline in Patients Receiving Immune Checkpoint Inhibitors. *Am J*  
415 *Kidney Dis.* 2022;79(1):134-7. Epub 20210624. doi: 10.1053/j.ajkd.2021.05.012. PubMed PMID:  
416 34174363; PMCID: PMC8855486.
- 417 12. Seethapathy H, Zhao S, Chute DF, Zubiri L, Oppong Y, Strohbehn I, Cortazar FB, Leaf DE,  
418 Mooradian MJ, Villani AC, Sullivan RJ, Reynolds K, Sise ME. The Incidence, Causes, and Risk  
419 Factors of Acute Kidney Injury in Patients Receiving Immune Checkpoint Inhibitors. *Clin J Am*  
420 *Soc Nephrol.* 2019;14(12):1692-700. Epub 20191031. doi: 10.2215/CJN.00990119. PubMed  
421 PMID: 31672794; PMCID: PMC6895474.
- 422 13. Inker LA, Eckfeldt J, Levey AS, Leiendecker-Foster C, Rynders G, Manzi J, Waheed S,  
423 Coresh J. Expressing the CKD-EPI (Chronic Kidney Disease Epidemiology Collaboration) cystatin  
424 C equations for estimating GFR with standardized serum cystatin C values. *Am J Kidney Dis.*  
425 2011;58(4):682-4. Epub 20110819. doi: 10.1053/j.ajkd.2011.05.019. PubMed PMID: 21855190;  
426 PMCID: PMC4421875.
- 427 14. Stevens LA, Coresh J, Schmid CH, Feldman HI, Froissart M, Kusek J, Rossert J, Van Lente  
428 F, Bruce RD, 3rd, Zhang YL, Greene T, Levey AS. Estimating GFR using serum cystatin C alone  
429 and in combination with serum creatinine: a pooled analysis of 3,418 individuals with CKD. *Am J*  
430 *Kidney Dis.* 2008;51(3):395-406. doi: 10.1053/j.ajkd.2007.11.018. PubMed PMID: 18295055;  
431 PMCID: PMC2390827.
- 432 15. Levin A, Stevens PE, Bilous RW, Coresh J, De Francisco AL, De Jong PE, Griffith KE,  
433 Hemmelgarn BR, Iseki K, Lamb EJ. Kidney Disease: Improving Global Outcomes (KDIGO) CKD  
434 Work Group. KDIGO 2012 clinical practice guideline for the evaluation and management of  
435 chronic kidney disease. *Kidney international supplements.* 2013;3(1):1-150.
- 436 16. Delgado C, Baweja M, Crews DC, Eneanya ND, Gadegbeku CA, Inker LA, Mendu ML,  
437 Miller WG, Moxey-Mims MM, Roberts GV, St Peter WL, Warfield C, Powe NR. A Unifying  
438 Approach for GFR Estimation: Recommendations of the NKF-ASN Task Force on Reassessing the  
439 Inclusion of Race in Diagnosing Kidney Disease. *J Am Soc Nephrol.* 2021;32(12):2994-3015. Epub  
440 2021/09/25. doi: 10.1681/asn.2021070988. PubMed PMID: 34556489; PMCID: PMC8638402.
- 441 17. Rybak MJ, Le J, Lodise TP, Levine DP, Bradley JS, Liu C, Mueller BA, Pai MP, Wong-  
442 Beringer A, Rotschafer JC, Rodvold KA, Maples HD, Lomaestro BM. Therapeutic monitoring of  
443 vancomycin for serious methicillin-resistant *Staphylococcus aureus* infections: A revised  
444 consensus guideline and review by the American Society of Health-System Pharmacists, the  
445 Infectious Diseases Society of America, the Pediatric Infectious Diseases Society, and the  
446 Society of Infectious Diseases Pharmacists. *Am J Health Syst Pharm.* 2020;77(11):835-64. doi:  
447 10.1093/ajhp/zxaa036. PubMed PMID: 32191793.
- 448 18. van Hal SJ, Paterson DL, Lodise TP. Systematic review and meta-analysis of vancomycin-  
449 induced nephrotoxicity associated with dosing schedules that maintain troughs between 15 and  
450 20 milligrams per liter. *Antimicrob Agents Chemother.* 2013;57(2):734-44. Epub 20121119. doi:  
451 10.1128/AAC.01568-12. PubMed PMID: 23165462; PMCID: PMC3553731.

- 452 19. Tuon FF, Romero R, Gasparetto J, Cieslinski J. Vancomycin trough level and loading dose.  
453 Infect Drug Resist. 2018;11:2393-6. Epub 20181123. doi: 10.2147/IDR.S184897. PubMed PMID:  
454 30538506; PMCID: PMC6260187.
- 455 20. Vandecasteele SJ, De Vriese AS. Recent changes in vancomycin use in renal failure.  
456 Kidney Int. 2010;77(9):760-4. Epub 20100224. doi: 10.1038/ki.2010.35. PubMed PMID:  
457 20182415.
- 458 21. Zonozi R, Wu A, Shin JI, Secora A, Coresh J, Inker LA, Chang AR, Grams ME. Elevated  
459 Vancomycin Trough Levels in a Tertiary Health System: Frequency, Risk Factors, and Prognosis.  
460 Mayo Clin Proc. 2019;94(1):17-26. doi: 10.1016/j.mayocp.2018.08.034. PubMed PMID:  
461 30611444; PMCID: PMC6341482.
- 462 22. Chen KS, Bullard MJ, Chien YY, Lee SY. Baclofen toxicity in patients with severely  
463 impaired renal function. Ann Pharmacother. 1997;31(11):1315-20. doi:  
464 10.1177/106002809703101108. PubMed PMID: 9391686.
- 465 23. Cheong M, Lee J, Lee TY, Kim SB. Prevalence and risk factors of baclofen neurotoxicity in  
466 patients with severely impaired renal function. Nefrologia (Engl Ed). 2020;40(5):543-51. Epub  
467 20200724. doi: 10.1016/j.nefro.2020.03.004. PubMed PMID: 32718544.
- 468 24. Critchley JA, Critchley LA. Digoxin toxicity in chronic renal failure: treatment by multiple  
469 dose activated charcoal intestinal dialysis. Hum Exp Toxicol. 1997;16(12):733-5. doi:  
470 10.1177/096032719701601207. PubMed PMID: 9429088.
- 471 25. Aronson JK, Grahame-Smith DG. Altered distribution of digoxin in renal failure--a cause  
472 of digoxin toxicity? Br J Clin Pharmacol. 1976;3(6):1045-51. doi: 10.1111/j.1365-  
473 2125.1976.tb00356.x. PubMed PMID: 22216528; PMCID: PMC1428967.
- 474 26. Hudson JQ, Nolin TD. Pragmatic Use of Kidney Function Estimates for Drug Dosing: The  
475 Tide Is Turning. Adv Chronic Kidney Dis. 2018;25(1):14-20. Epub 2018/03/04. doi:  
476 10.1053/j.ackd.2017.10.003. PubMed PMID: 29499882.
- 477 27. Yoshida S, Suda G, Ohara M, Fu Q, Yang Z, Hosoda S, Kimura M, Akinori K, Tokuchi Y,  
478 Yamada R, Kitagataya T, Suzuki K, Kawagishi N, Nakai M, Sho T, Natsuizaka M, Morikawa K,  
479 Ogawa K, Maehara O, Ohnishi S, Sakamoto N. Frequency and Characteristics of Overestimated  
480 Renal Function in Japanese Patients with Chronic Liver Disease and Its Relation to Sarcopenia.  
481 Nutrients. 2021;13(7). Epub 2021/08/11. doi: 10.3390/nu13072415. PubMed PMID: 34371925;  
482 PMCID: PMC8308887.
- 483 28. Baracos VE, Arribas L. Sarcopenic obesity: hidden muscle wasting and its impact for  
484 survival and complications of cancer therapy. Ann Oncol. 2018;29(suppl\_2):ii1-ii9. Epub  
485 2018/03/06. doi: 10.1093/annonc/mdx810. PubMed PMID: 29506228.
- 486 29. Shlipak MG, Matsushita K, Arnlov J, Inker LA, Katz R, Polkinghorne KR, Rothenbacher D,  
487 Sarnak MJ, Astor BC, Coresh J, Levey AS, Gansevoort RT, Consortium CKDP. Cystatin C versus  
488 creatinine in determining risk based on kidney function. N Engl J Med. 2013;369(10):932-43.  
489 doi: 10.1056/NEJMoa1214234. PubMed PMID: 24004120; PMCID: PMC3993094.
- 490 30. Levey AS, Titan SM, Powe NR, Coresh J, Inker LA. Kidney Disease, Race, and GFR  
491 Estimation. Clin J Am Soc Nephrol. 2020;15(8):1203-12. Epub 20200511. doi:  
492 10.2215/CJN.12791019. PubMed PMID: 32393465; PMCID: PMC7409747.
- 493 31. Ebert N, Shlipak MG. Cystatin C is ready for clinical use. Curr Opin Nephrol Hypertens.  
494 2020;29(6):591-8. doi: 10.1097/MNH.0000000000000638. PubMed PMID: 32868529.

- 495 32. Shlipak MG, Tummalapalli SL, Boulware LE, Grams ME, Ix JH, Jha V, Kengne AP, Madero  
496 M, Mihaylova B, Tangri N, Cheung M, Jadoul M, Winkelmayer WC, Zoungas S, Conference P. The  
497 case for early identification and intervention of chronic kidney disease: conclusions from a  
498 Kidney Disease: Improving Global Outcomes (KDIGO) Controversies Conference. *Kidney Int.*  
499 2021;99(1):34-47. Epub 20201027. doi: 10.1016/j.kint.2020.10.012. PubMed PMID: 33127436.
- 500 33. Delgado C, Baweja M, Crews DC, Eneanya ND, Gadegbeku CA, Inker LA, Mendu ML,  
501 Miller WG, Moxey-Mims MM, Roberts GV, St Peter WL, Warfield C, Powe NR. A Unifying  
502 Approach for GFR Estimation: Recommendations of the NKF-ASN Task Force on Reassessing the  
503 Inclusion of Race in Diagnosing Kidney Disease. *J Am Soc Nephrol.* 2021. Epub 20210923. doi:  
504 10.1681/ASN.2021070988. PubMed PMID: 34556489; PMCID: PMC8638402.
- 505 34. Oh Y, Park S, Park E, Lee J, Lee H, Kim J, Cho J. Correlation between vancomycin  
506 clearance and cystatin C-based glomerular filtration rate in paediatric patients. *Br J Clin*  
507 *Pharmacol.* 2021;87(8):3190-6. Epub 20210126. doi: 10.1111/bcp.14733. PubMed PMID:  
508 33496976.
- 509 35. Teaford HR, Stevens RW, Rule AD, Mara KC, Kashani KB, Lieske JC, O'Horo J, Barreto EF.  
510 Prediction of Vancomycin Levels Using Cystatin C in Overweight and Obese Patients: a  
511 Retrospective Cohort Study of Hospitalized Patients. *Antimicrob Agents Chemother.* 2020;65(1).  
512 Epub 20201216. doi: 10.1128/AAC.01487-20. PubMed PMID: 33106257; PMCID: PMC7927827.
- 513 36. Frazee E, Rule AD, Lieske JC, Kashani KB, Barreto JN, Virk A, Kuper PJ, Dierkhising RA,  
514 Leung N. Cystatin C-Guided Vancomycin Dosing in Critically Ill Patients: A Quality Improvement  
515 Project. *Am J Kidney Dis.* 2017;69(5):658-66. Epub 20170125. doi: 10.1053/j.ajkd.2016.11.016.  
516 PubMed PMID: 28131530.
- 517 37. Frazee EN, Rule AD, Herrmann SM, Kashani KB, Leung N, Virk A, Voskoboev N, Lieske JC.  
518 Serum cystatin C predicts vancomycin trough levels better than serum creatinine in hospitalized  
519 patients: a cohort study. *Crit Care.* 2014;18(3):R110. Epub 20140529. doi: 10.1186/cc13899.  
520 PubMed PMID: 24887089; PMCID: PMC4075252.
- 521 38. Barreto EF, Rule AD, Murad MH, Kashani KB, Lieske JC, Erwin PJ, Steckelberg JM, Gajic O,  
522 Reid JM, Kane-Gill SL. Prediction of the Renal Elimination of Drugs With Cystatin C vs Creatinine:  
523 A Systematic Review. *Mayo Clin Proc.* 2019;94(3):500-14. Epub 20190131. doi:  
524 10.1016/j.mayocp.2018.08.002. PubMed PMID: 30713050.
- 525 39. Alappan R, Perazella MA, Buller GK. Hyperkalemia in hospitalized patients treated with  
526 trimethoprim-sulfamethoxazole. *Ann Intern Med.* 1996;124(3):316-20. doi: 10.7326/0003-  
527 4819-124-3-199602010-00006. PubMed PMID: 8554227.
- 528 40. Hallberg P, Melhus H, Hansson LO, Larsson A. Cystatin C vs creatinine as markers of  
529 renal function in patients on digoxin treatment. *Ups J Med Sci.* 2004;109(3):247-53. doi:  
530 10.3109/2000-1967-087. PubMed PMID: 15508527.
- 531 41. Nakamura T, Ioroi T, Sakaeda T, Horinouchi M, Hayashi N, Saito K, Kosaka M, Okamura  
532 N, Kadoyama K, Kumagai S, Okumura K. Serum cystatin C levels to predict serum concentration  
533 of digoxin in Japanese patients. *Int J Med Sci.* 2006;3(3):92-6. Epub 20060517. doi:  
534 10.7150/ijms.3.92. PubMed PMID: 16761077; PMCID: PMC1475426.
- 535 42. O'Riordan S, Ouldred E, Brice S, Jackson SH, Swift CG. Serum cystatin C is not a better  
536 marker of creatinine or digoxin clearance than serum creatinine. *Br J Clin Pharmacol.*  
537 2002;53(4):398-402. doi: 10.1046/j.1365-2125.2002.01549.x. PubMed PMID: 11966673;  
538 PMCID: PMC1874275.

- 539 43. Garcia A, Hermida J, Tutor JC. Estimation of the glomerular filtration rate from serum  
540 creatinine and cystatin C with regard to therapeutic digoxin monitoring. *J Clin Pharmacol.*  
541 2007;47(11):1450-5. Epub 20070813. doi: 10.1177/0091270007305503. PubMed PMID:  
542 17698593.
- 543 44. Salek T, Vodicka M, Griva M. Cystatin C may be better than creatinine for digoxin dosing  
544 in older adults with atrial fibrillation. *J Clin Lab Anal.* 2020;34(10):e23427. Epub 20200617. doi:  
545 10.1002/jcla.23427. PubMed PMID: 32716587; PMCID: PMC7595907.
- 546 45. Leung NY, Whyte IM, Isbister GK. Baclofen overdose: Defining the spectrum of toxicity.  
547 *Emergency Medicine Australasia.* 2006;18(1):77-82. doi: [https://doi.org/10.1111/j.1742-](https://doi.org/10.1111/j.1742-6723.2006.00805.x)  
548 [6723.2006.00805.x](https://doi.org/10.1111/j.1742-6723.2006.00805.x).
- 549 46. Norouzi S, Farouk SS, Sparks MA. Back off baclofen when the kidneys don't work. *Kidney*  
550 *Int.* 2020;98(4):829-31. doi: 10.1016/j.kint.2020.05.026. PubMed PMID: 32998812.
- 551 47. Mindikoglu AL, Dowling TC, Weir MR, Seliger SL, Christenson RH, Magder LS.  
552 Performance of chronic kidney disease epidemiology collaboration creatinine-cystatin C  
553 equation for estimating kidney function in cirrhosis. *Hepatology.* 2014;59(4):1532-42. doi:  
554 <https://doi.org/10.1002/hep.26556>.
- 555 48. Mindikoglu AL, Opekun AR, Mitch WE, Magder LS, Christenson RH, Dowling TC, Weir  
556 MR, Seliger SL, Howell CD, Raufman JP, Rana A, Goss JA, Khaderi SA, Vierling JM. Cystatin C Is a  
557 Gender-Neutral Glomerular Filtration Rate Biomarker in Patients with Cirrhosis. *Dig Dis Sci.*  
558 2018;63(3):665-75. Epub 2018/02/03. doi: 10.1007/s10620-017-4897-z. PubMed PMID:  
559 29392554; PMCID: PMC5994910.
- 560 49. Krolewski AS, Warram JH, Forsblom C, Smiles AM, Thorn L, Skupien J, Harjutsalo V,  
561 Stanton R, Eckfeldt JH, Inker LA, Groop PH. Serum concentration of cystatin C and risk of end-  
562 stage renal disease in diabetes. *Diabetes Care.* 2012;35(11):2311-6. Epub 20120730. doi:  
563 10.2337/dc11-2220. PubMed PMID: 22851596; PMCID: PMC3476893.
- 564 50. Shlipak MG, Wassel Fyr CL, Chertow GM, Harris TB, Kritchevsky SB, Tylavsky FA,  
565 Satterfield S, Cummings SR, Newman AB, Fried LF. Cystatin C and mortality risk in the elderly:  
566 the health, aging, and body composition study. *J Am Soc Nephrol.* 2006;17(1):254-61. Epub  
567 20051102. doi: 10.1681/ASN.2005050545. PubMed PMID: 16267155.
- 568 51. Ix JH, Shlipak MG, Chertow GM, Whooley MA. Association of cystatin C with mortality,  
569 cardiovascular events, and incident heart failure among persons with coronary heart disease:  
570 data from the Heart and Soul Study. *Circulation.* 2007;115(2):173-9. Epub 20061226. doi:  
571 10.1161/CIRCULATIONAHA.106.644286. PubMed PMID: 17190862; PMCID: PMC2771187.
- 572 52. Vigil A, Condes E, Vigil L, Gallar P, Oliet A, Ortega O, Rodriguez I, Ortiz M, Herrero JC,  
573 Mon C, Cobo G, Jimenez J. Cystatin C as a predictor of mortality and cardiovascular events in a  
574 population with chronic kidney disease. *Int J Nephrol.* 2014;2014:127943. Epub 20140211. doi:  
575 10.1155/2014/127943. PubMed PMID: 24672725; PMCID: PMC3942201.
- 576 53. Helmersson-Karlqvist J, Lipcsey M, Arnlov J, Bell M, Ravn B, Dardashti A, Larsson A.  
577 Cystatin C predicts long term mortality better than creatinine in a nationwide study of intensive  
578 care patients. *Sci Rep.* 2021;11(1):5882. Epub 20210315. doi: 10.1038/s41598-021-85370-8.  
579 PubMed PMID: 33723337; PMCID: PMC7961058.
- 580 54. Bell M, Granath F, Martensson J, Lofberg E, Ekblom A, Martling CR, King. Cystatin C is  
581 correlated with mortality in patients with and without acute kidney injury. *Nephrol Dial*

582 Transplant. 2009;24(10):3096-102. Epub 20090425. doi: 10.1093/ndt/gfp196. PubMed PMID:  
583 19395727.

584 55. Demirtaş S, Akan O, Can M, Elmali E, Akan H. Cystatin C can be affected by nonrenal  
585 factors: a preliminary study on leukemia. Clin Biochem. 2006;39(2):115-8. Epub 2005/12/13.  
586 doi: 10.1016/j.clinbiochem.2005.10.009. PubMed PMID: 16337174.

587 56. Oc MA, Demir H, Cekmen MB, Isgoren S, Gorur GD, Bilgili U. Correlation of Cystatin-C  
588 and radionuclidic measurement method of glomerular filtration rate in patients with lung  
589 cancer receiving cisplatin treatment. Ren Fail. 2014;36(7):1043-50. Epub 2014/05/23. doi:  
590 10.3109/0886022x.2014.918813. PubMed PMID: 24846459.

591  
592

593 **Table 1. Patient Characteristics**

|                                                          | <b>Overall</b> | <b>eGFR discrepancy</b> | <b>Reference group</b> |
|----------------------------------------------------------|----------------|-------------------------|------------------------|
| <b>Covariates</b>                                        | N=1988         | N=579                   | N=1409                 |
| <b>Age</b>                                               | 66 (14.1)      | 68 (14.3)               | 65(14.0)               |
| <b>Female Sex</b>                                        | 965 (48.5)     | 293 (50.6)              | 672 (47.7)             |
| <b>Race/Ethnicity</b>                                    |                |                         |                        |
| White                                                    | 1555 (78.2)    | 467 (80.7)              | 1088 (77.2)            |
| Black                                                    | 184 (9.3)      | 43 (7.4)                | 141 (10.0)             |
| Hispanic                                                 | 89 (4.5)       | 27 (4.7)                | 62 (4.4)               |
| Asian                                                    | 72 (3.6)       | 20 (3.5)                | 52 (3.7)               |
| Other                                                    | 88 (4.4)       | 22 (3.8)                | 66 (4.7)               |
| <b>Body Mass Index (kg/m<sup>2</sup>)</b>                |                |                         |                        |
| Underweight (<18.5)                                      | 54 (3.6)       | 25 (6.1)                | 29 (2.6)               |
| Normal (18.5 - 24.9)                                     | 442 (29.4)     | 126 (30.8)              | 316 (28.9)             |
| Overweight (25 - 29.9)                                   | 515 (34.2)     | 114 (27.9)              | 401 (36.6)             |
| Obese (≥30)                                              | 493 (32.8)     | 144 (35.2)              | 349 (31.9)             |
| <b>Comorbidities</b>                                     |                |                         |                        |
| Hypertension                                             | 1600 (80.5)    | 507 (87.6)              | 1093 (77.6)            |
| Coronary Artery Disease                                  | 987 (49.6)     | 377 (65.1)              | 610 (43.3)             |
| Diabetes Mellitus                                        | 1008 (50.7)    | 393 (67.9)              | 615 (43.6)             |
| Cirrhosis                                                | 105 (5.3)      | 61 (10.5)               | 44 (3.1)               |
| Human Immunodeficiency Virus                             | 82 (4.1)       | 20 (3.5)                | 62 (4.4)               |
| Smoking                                                  | 806 (40.5)     | 266 (45.9)              | 540 (38.3)             |
| Malnutrition                                             | 275 (13.8)     | 97 (16.8)               | 178 (12.6)             |
| Thyroid disease                                          | 503 (25.3)     | 177 (30.6)              | 326 (23.1)             |
| Chronic kidney disease                                   |                |                         |                        |
| eGFR 30 - 50 mL/min per 1.72m <sup>2</sup>               | 804 (40.4)     | 254 (43.9)              | 550 (39.0)             |
| eGFR < 30 mL/min per 1.73m <sup>2</sup>                  | 514 (25.8)     | 211 (36.5)              | 303 (21.5)             |
| <b>Medication Use</b>                                    |                |                         |                        |
| ACEi/ARB                                                 | 1128 (56.7)    | 345 (59.6)              | 783 (55.6)             |
| Proton Pump Inhibitors                                   | 1291 (64.9)    | 441 (76.2)              | 850 (60.3)             |
| Diuretics                                                | 1282 (64.5)    | 474 (81.9)              | 808 (57.3)             |
| Corticosteroids*                                         | 393 (19.8)     | 207 (35.8)              | 186 (13.2)             |
| <b>Labs</b>                                              |                |                         |                        |
| Serum Creatinine (mg/dL)                                 | 1.62 (1.03)    | 1.44 (0.75)             | 1.70 (1.12)            |
| Serum Cystatin C (mg/L)                                  | 1.82 (0.97)    | 2.37 (1.03)             | 1.59 (0.84)            |
| eGFR <sub>CRE-CYS</sub> (mL/min per 1.73m <sup>2</sup> ) | 51 (28)        | 41 (22)                 | 55 (29)                |
| Serum Albumin (g/dL)                                     |                |                         |                        |
| <3.0                                                     | 297 (15.5)     | 198 (34.6)              | 99 (7.4)               |
| 3.0-3.49                                                 | 187 (9.8)      | 96 (16.8)               | 91 (6.8)               |
| 3.5-3.9                                                  | 280 (14.6)     | 111 (19.4)              | 169 (12.6)             |
| ≥4.0                                                     | 1152 (60.1)    | 168 (29.3)              | 984 (73.3)             |
| Blood Urea Nitrogen (mg/dL)                              |                |                         |                        |
| ≤17                                                      | 501 (25.2)     | 99 (17.1)               | 402 (28.6)             |
| 17-25                                                    | 526 (26.5)     | 107 (18.5)              | 419 (29.8)             |
| 25-39                                                    | 482 (24.3)     | 147 (25.4)              | 335 (23.8)             |
| >39                                                      | 478 (24.1)     | 226 (39.0)              | 252 (17.9)             |
| Hemoglobin (g/dL)                                        |                |                         |                        |
| ≤10.0                                                    | 597 (30.0)     | 324 (56.0)              | 273(19.4)              |
| 10 -11.9                                                 | 505 (25.4)     | 138 (23.8)              | 367 (26.0)             |
| ≥12.0                                                    | 886 (44.6)     | 117 (20.2)              | 769 (54.6)             |

594 **Table 1.** eGFR discrepancy was defined as eGFR<sub>CYS</sub> more than 30% lower than eGFR<sub>CRE</sub>. Count and  
595 percent or mean and standard deviations are shown. Body mass index was missing for 479 participants  
596 (24%), serum albumin was missing for 72 participants (3.6%), and hemoglobin was missing for 46  
597 participants (2.3%). The remaining data was complete. Chronic kidney disease was staged using the  
598 eGFR<sub>CRE-CYS</sub>. Abbreviations: eGFR<sub>CRE-CYS</sub> = estimated Glomerular Filtration Rate using creatinine and  
599 cystatin C equation, ACEi/ARB = Angiotensin Converting Enzyme Inhibitor/Angiotensin Receptor Blocker.

600  
601  
602

**Figure 1. Patient flow**

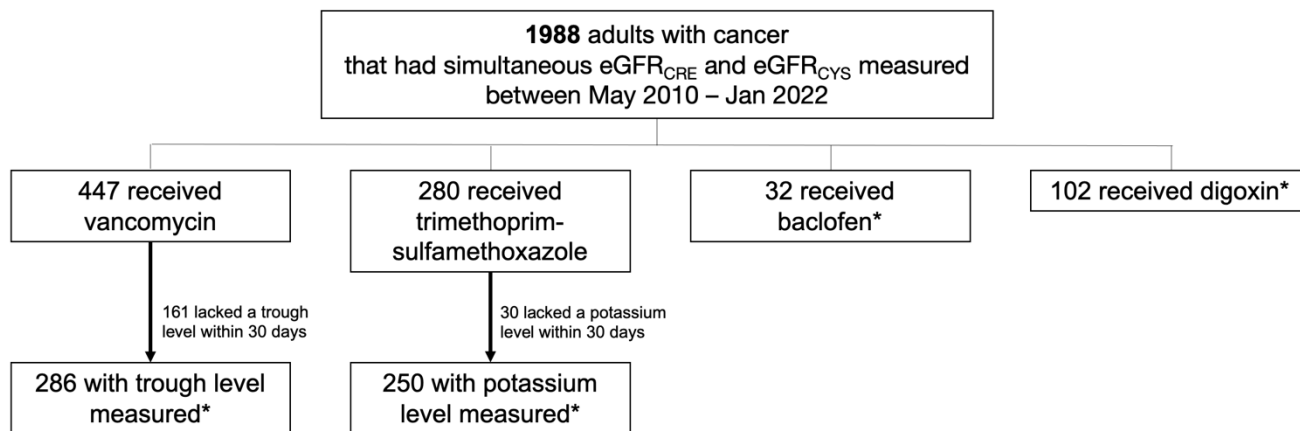

603  
604  
605  
606  
607  
608  
609  
610

**Figure 1.** Patient flow. Exposure to each medication was determined by an active prescription within 90 days of the baseline date. \*Shows the analyzed sample for each medication. Abbreviations: eGFR<sub>CRE</sub> = creatinine-based estimated glomerular filtration rate, eGFR<sub>CYS</sub> = cystatin c-based estimated glomerular filtration rate.

611 **Figure 2. Predictors of eGFR discrepancy**

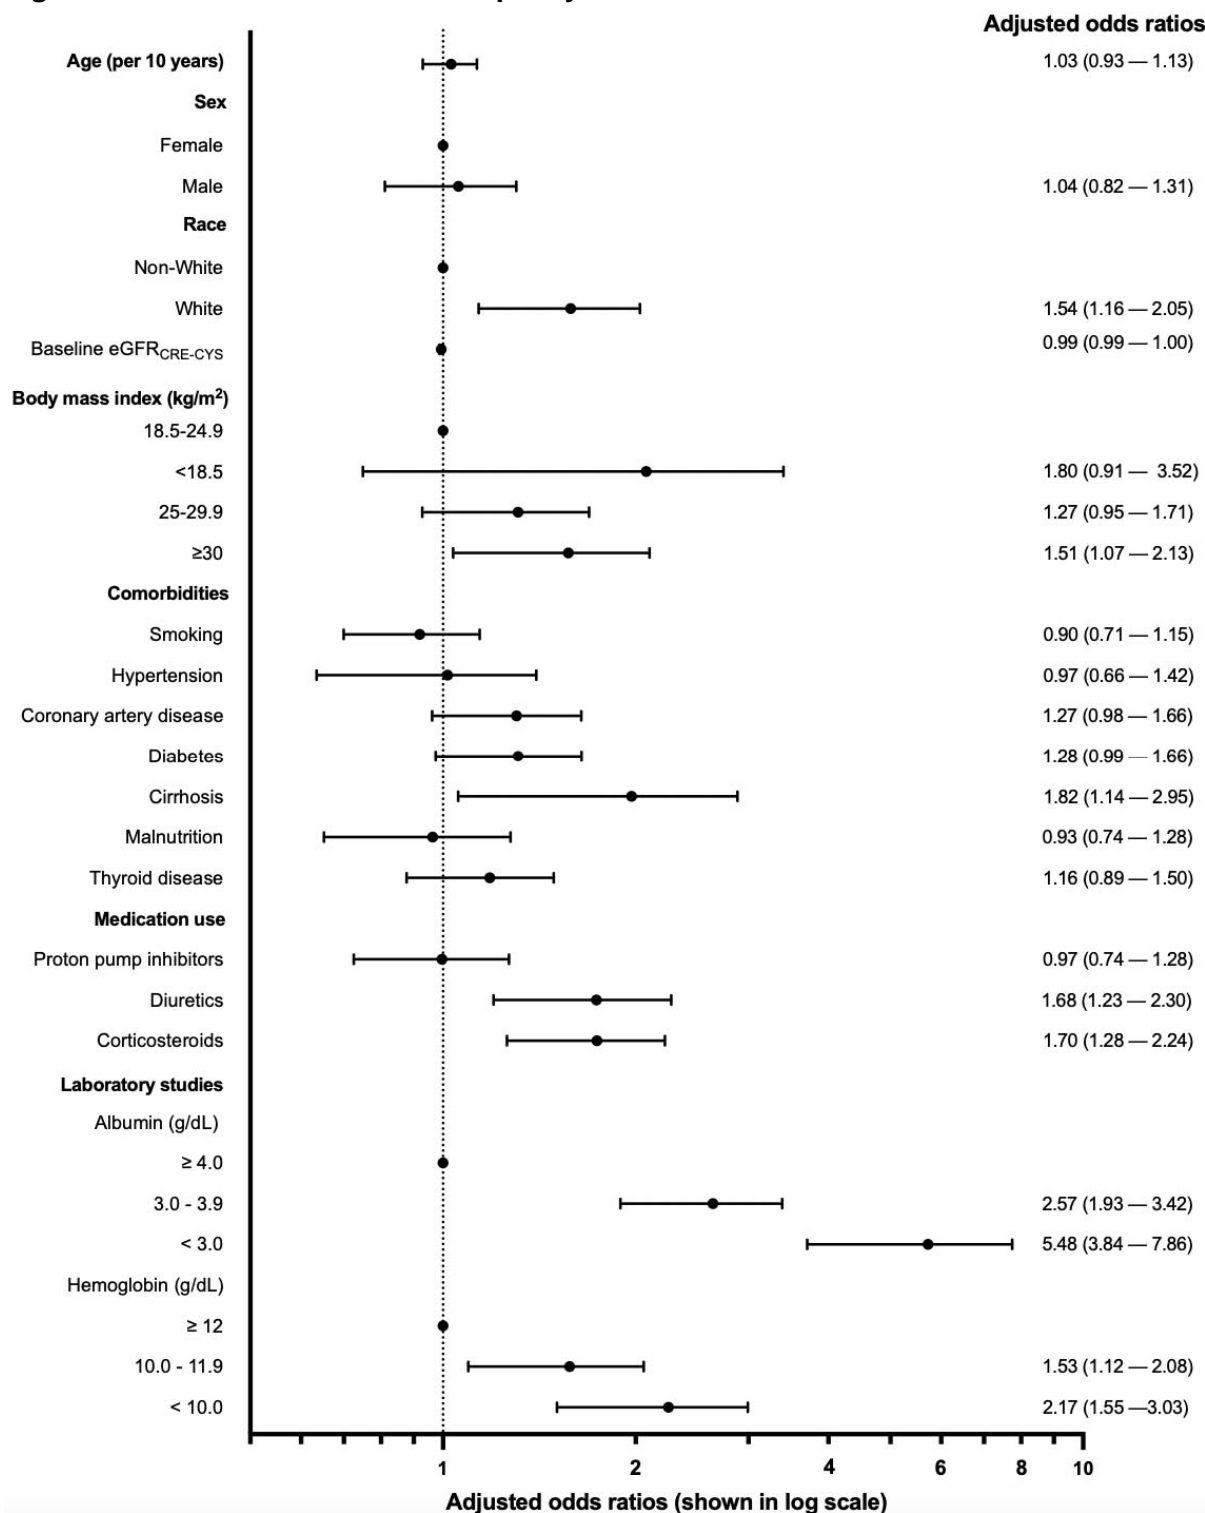

612 **Figure 2. Forrest plot showing adjusted odds ratios.** Logistic regression models were used to  
 613 estimate the association between baseline characteristics and the eGFR discrepancy (eGFR<sub>CYS</sub> > 30%  
 614 lower than eGFR<sub>CRE</sub>) in patients with cancer. The unadjusted and adjusted models are also shown in  
 615 **Supplemental Table 2.** Abbreviations: eGFR<sub>CRE-CYS</sub> = estimated Glomerular Filtration Rate calculated  
 616 using the 2021 race-free combined serum creatinine and cystatin C equation  
 617



618 **Figure 3. Rate of eGFR discrepancy by albumin and hemoglobin levels**  
619

3A) Rate of eGFR discrepancy by albumin level

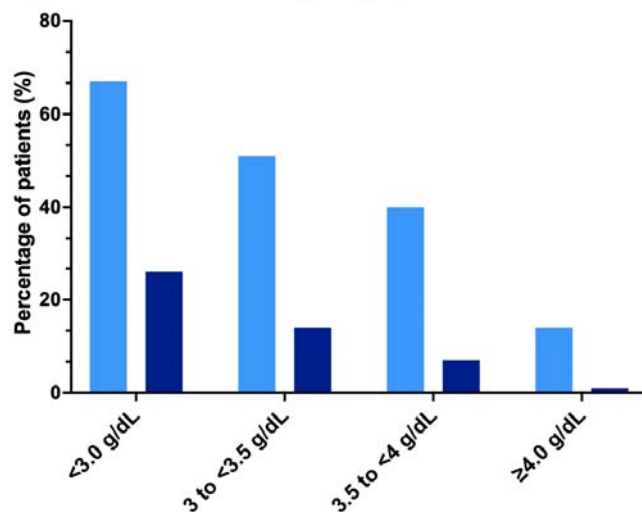

3B) Rate of eGFR discrepancy by hemoglobin level

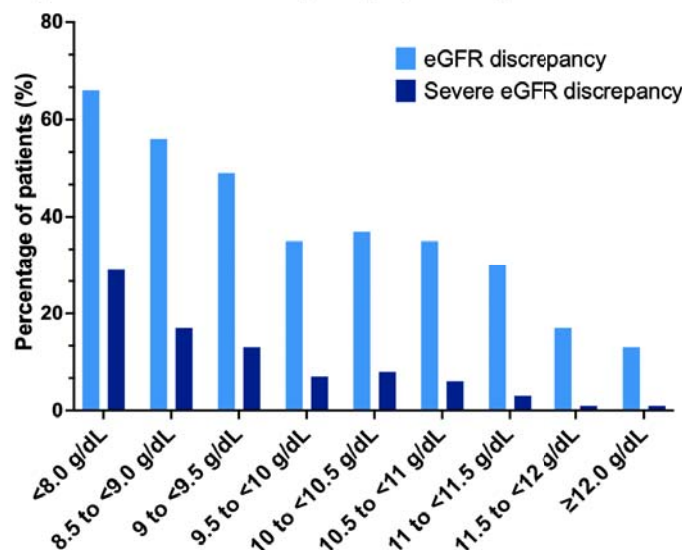

620  
621  
622  
623  
624  
625  
626  
627  
628

**Figure 3.** eGFR discrepancy defined by  $eGFR_{CYS} > 30\%$  lower than  $eGFR_{CRE}$  shown with light blue bars, and severe eGFR discrepancy ( $eGFR_{CYS} > 50\%$  lower than  $eGFR_{CRE}$  and  $eGFR_{CYS} < 30\text{mL}/\text{min}/1.73\text{m}^2$ ) shown with dark blue bars become more common in patients with worsening hypoalbuminemia (3A) and anemia (3B).

629 **Figure 4. Rate of supratherapeutic vancomycin levels and trimethoprim-**  
630 **sulfamethoxazole-related hyperkalemia in patients with eGFR discrepancy**  
631

4A. Vancomycin trough levels

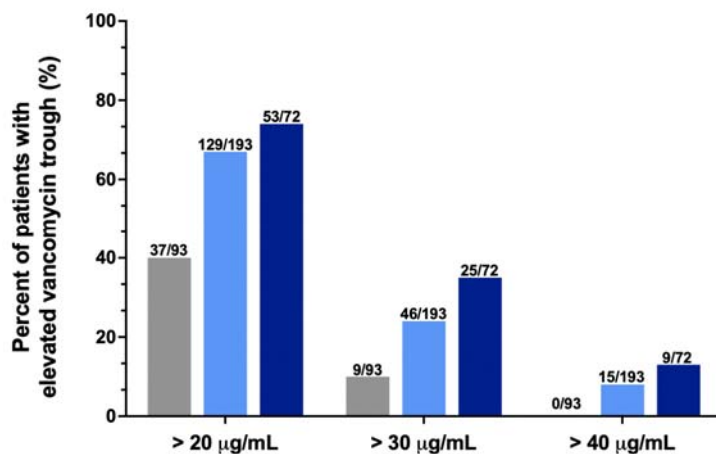

4B. Peak potassium levels on Trimethoprim-sulfamethoxazole

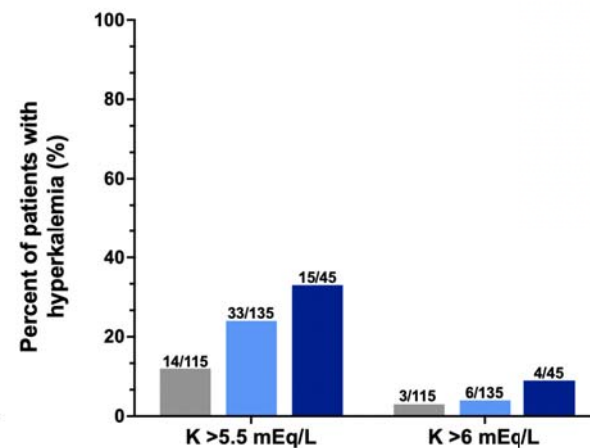

632 ■ Reference Group ■ >30% Discrepancy ■ Severe Discrepancy

633 **Figure 4A.** Highest trough vancomycin levels obtained within 30 days of starting vancomycin in  
634 patients with eGFR discrepancy (eGFR<sub>CYS</sub> more than 30% lower than eGFR<sub>CRE</sub>), severe eGFR  
635 discrepancy (eGFR<sub>CYS</sub> more than 50% lower than eGFR<sub>CRE</sub> and eGFR<sub>CYS</sub> < 30mL/min/1.73m<sup>2</sup>),  
636 and the reference group. We excluded any vancomycin level obtained less than 6 hours after  
637 the last administered vancomycin dose. **Figure 4B.** Rate of Grade 2 or 3 hyperkalemia in  
638 patients receiving trimethoprim-sulfamethoxazole.

639  
640  
641  
642

643 **Figure 5. Rate of baclofen toxicity and digoxin toxicity in patients with eGFR discrepancy**  
644

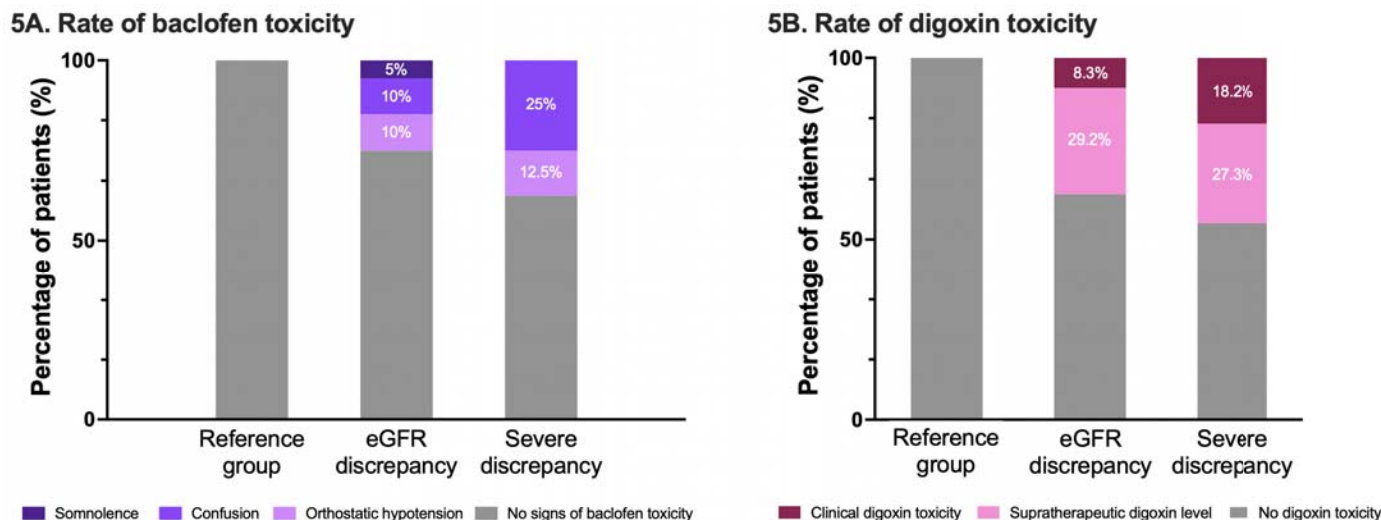

645  
646  
647 **Figure 5A.** Rate of baclofen toxicity in patients with eGFR discrepancy, severe eGFR,  
648 discrepancy and the reference group. **Figure 5B.** Rate of supratherapeutic digoxin level defined  
649 by  $>2.0\mu\text{g/dL}$ . Both cases of clinical digoxin toxicity occurred in patients with severe eGFR  
650 discrepancy ( $\text{eGFR}_{\text{CYS}}$  more than 50% lower than  $\text{eGFR}_{\text{CRE}}$  and  $\text{eGFR}_{\text{CYS}} < 30\text{mL/min/1.73m}^2$ ).  
651 There were no cases of supratherapeutic digoxin levels or digoxin toxicity in the reference  
652 group.  
653  
654

655 **Figure 6. Kaplan-Meier curve of 30-day survival**

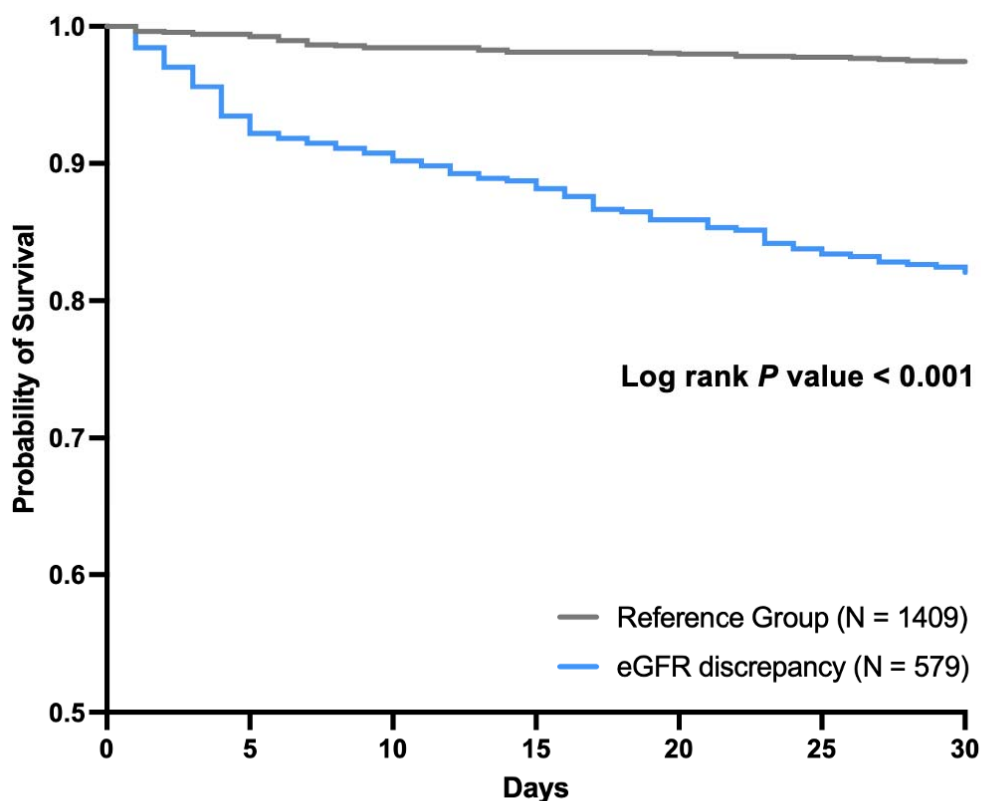

**Number at risk**

|                         |             |             |             |             |             |             |             |
|-------------------------|-------------|-------------|-------------|-------------|-------------|-------------|-------------|
| <b>Reference</b>        | <b>1409</b> | <b>1318</b> | <b>1300</b> | <b>1285</b> | <b>1280</b> | <b>1270</b> | <b>1262</b> |
| <b>eGFR discrepancy</b> | <b>579</b>  | <b>519</b>  | <b>494</b>  | <b>474</b>  | <b>453</b>  | <b>435</b>  | <b>425</b>  |

656  
 657  
 658 **Figure 6.** Survival analysis using Kaplan Meier method comparing 30-day survival between  
 659 reference group and those who had eGFR discrepancy. Unadjusted and adjusted model is  
 660 shown in Supplemental Table 7.  
 661

662  
 663  
 664  
 665  
 666  
 667  
 668  
 669  
 670  
 671  
 672  
 673  
 674  
 675

676 **Supplemental Figure 1. Scatter plot of creatinine-based and cystatin C-based eGFR, and**  
677 **distribution of eGFR difference**  
678

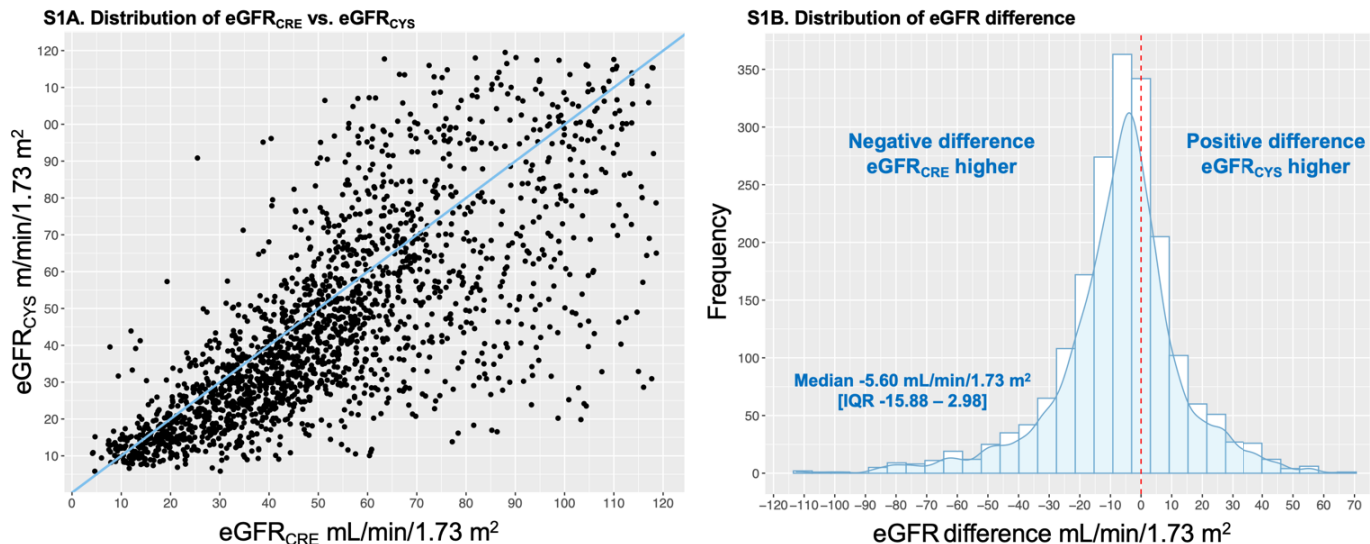

679  
680  
681 **Supplemental Figure 1. Scatterplot showing distribution of eGFR<sub>CRE</sub> and eGFR<sub>CYS</sub> among**  
682 **patients with cancer (S1A); the blue line is the line of equality. Figure S1B. A histogram and**  
683 **superimposed density curve showing the distribution of eGFR difference defined by eGFR<sub>CYS</sub>**  
684 **minus eGFR<sub>CRE</sub>. The red dotted line signifies equivalence between eGFR<sub>CRE</sub> and eGFR<sub>CYS</sub>.**  
685 Abbreviations: IQR, interquartile range  
686  
687  
688  
689

690 **Supplemental Figure 2. Scatter plot of creatinine-based and cystatin C-based eGFR by**  
691 **albumin and hemoglobin levels.**

692

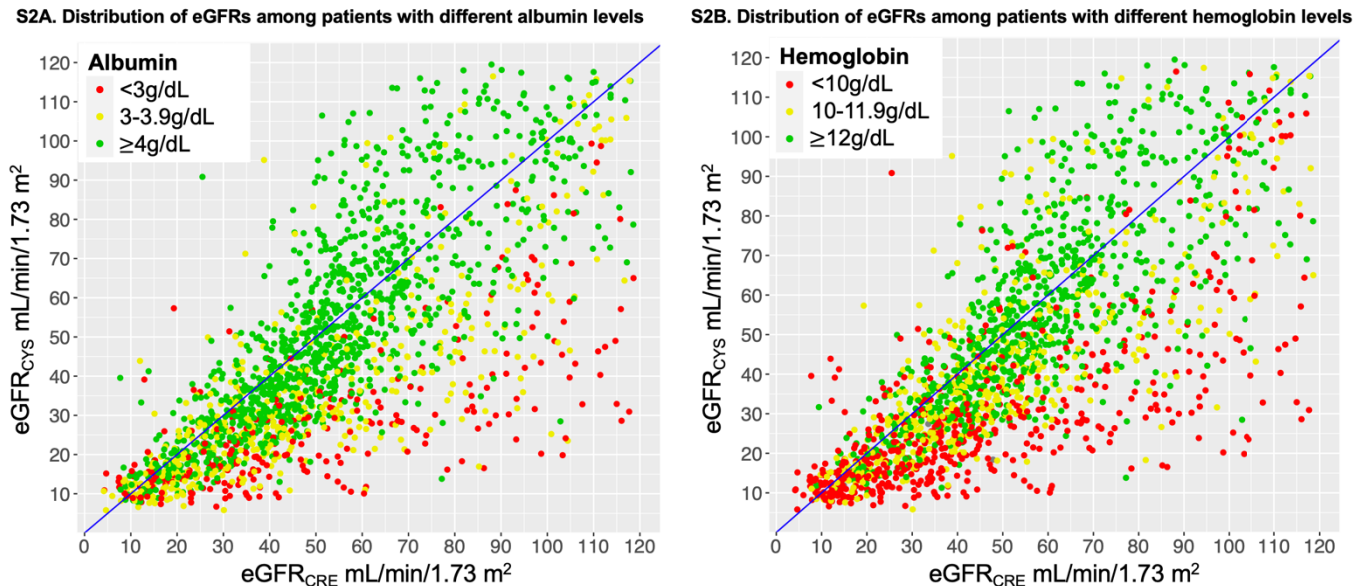

693

694

695 **Supplemental Figure 2.** Scatterplot showing distribution of eGFRs among patients with cancer  
696 stratified by different albumin levels (S2A) and hemoglobin levels (S2B) as shown. The identity  
697 line (line of equality) is shown in blue.

698

699

700

701

702 **Supplemental Figure 3.** Rate of eGFR discrepancies by cancer type  
703

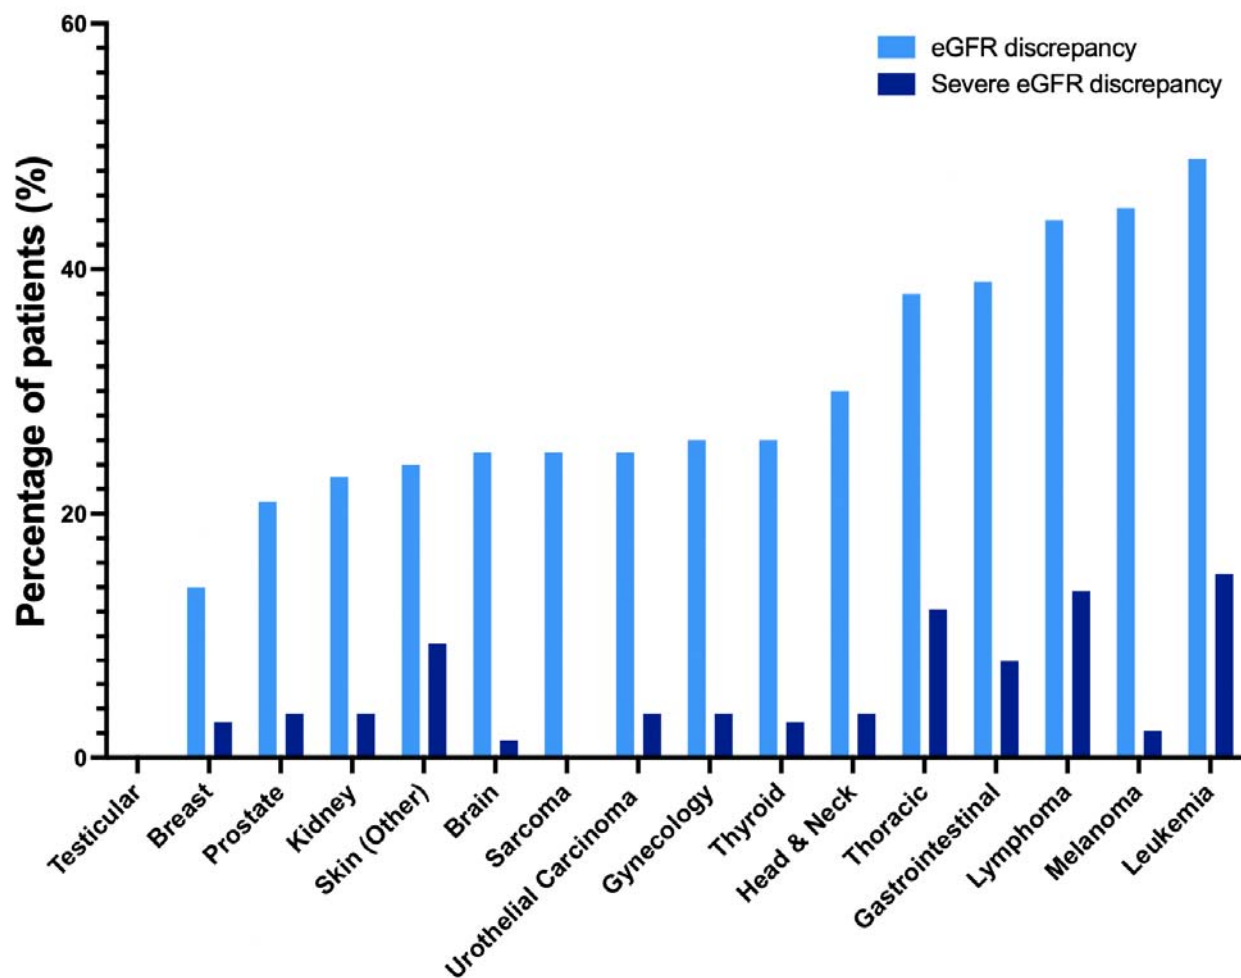

704 **Supplemental Figure 3.** Rate of eGFR discrepancy and severe eGFR discrepancy by cancer  
705 type. eGFR discrepancy is defined by an  $eGFR_{CYS}$  more than 30% lower than  $eGFR_{CRE}$ . Severe  
706 eGFR discrepancy was defined as an  $eGFR_{CYS}$  more than 50% lower than  $eGFR_{CRE}$  and  
707  $eGFR_{CYS} < 30\text{mL}/\text{min}/1.73\text{m}^2$ .  
708  
709  
710  
711  
712

713 **Supplemental Figure 4.** Changes in potassium levels among patients who received  
714 trimethoprim-sulfamethoxazole.  
715

**S4A. Mean change in potassium levels**

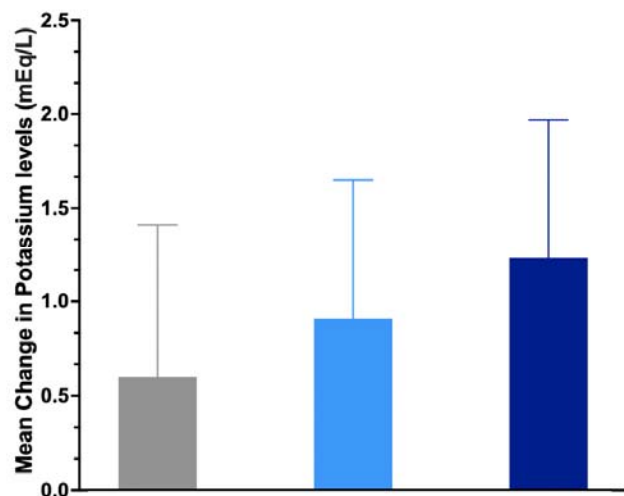

**S4B. Rate of  $\geq 0.5$  mEq/L rise in potassium levels**

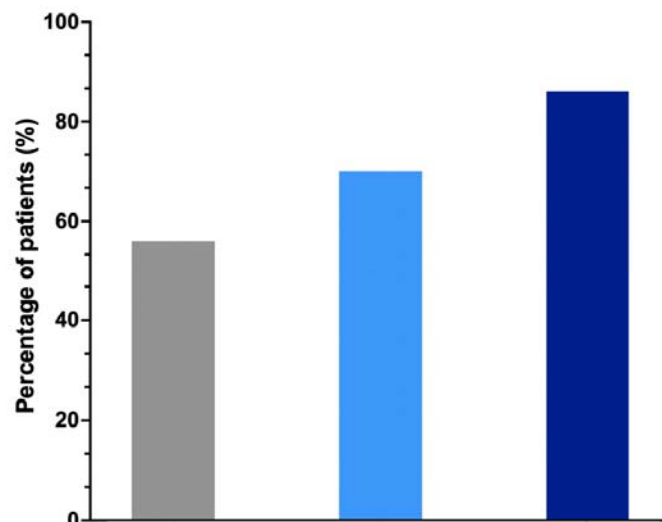

■ Reference Group ■ >30% Discrepancy ■ Severe Discrepancy

716 **Supplemental Figure S4A.** Mean change in potassium levels with standard deviations among  
717 trimethoprim-sulfamethoxazole recipients; error bars show standard deviation. **S4B.** Rate of  
718  $\geq 0.5$  mEq/L rise in potassium levels among trimethoprim-sulfamethoxazole recipients. eGFR  
719 discrepancy is defined by an  $eGFR_{CYS}$  more than 30% lower than  $eGFR_{CRE}$ . Severe eGFR  
720 discrepancy was defined as an  $eGFR_{CYS}$  more than 50% lower than  $eGFR_{CRE}$  and  $eGFR_{CYS} <$   
721  $30 \text{ mL/min/1.73m}^2$ .  
722  
723

724  
725  
726  
727



728 **Supplemental Table 1. Cancer type**

729

|                      | <b>Overall</b> | <b>eGFR discrepancy</b> | <b>Reference group</b> |
|----------------------|----------------|-------------------------|------------------------|
|                      | N=1988         | N=579                   | N=1409                 |
| <b>Cancer types*</b> |                |                         |                        |
| Urothelial           | 92 (4.6)       | 23 (4.0)                | 69 (4.9)               |
| Brain                | 40 (2.0)       | 10 (1.7)                | 30 (2.1)               |
| Breast               | 228 (11.5)     | 32 (5.5)                | 196 (13.9)             |
| Gastrointestinal     | 177 (8.9)      | 69 (11.9)               | 108 (7.7)              |
| Gynecologic          | 141 (7.1)      | 36 (6.2)                | 105 (7.5)              |
| Head & Neck          | 50 (2.5)       | 15 (2.6)                | 35 (2.5)               |
| Leukemia             | 129 (6.5)      | 63 (10.9)               | 66 (4.7)               |
| Lymphoma             | 123 (6.2)      | 54 (9.3)                | 69 (4.9)               |
| Melanoma             | 29 (1.5)       | 13 (2.2)                | 16 (1.1)               |
| Prostate             | 147 (7.4)      | 31 (5.4)                | 116 (8.2)              |
| Kidney               | 162 (8.1)      | 37 (6.4)                | 125 (8.9)              |
| Sarcoma              | 4 (0.2)        | 1 (0.2)                 | 3 (0.2)                |
| Testicular           | 1 (0.1)        | 0 (0.0)                 | 1 (0.1)                |
| Thoracic             | 114 (5.7)      | 43 (7.4)                | 71 (5.0)               |
| Thyroid              | 43 (2.2)       | 11 (1.9)                | 32 (2.3)               |
| Skin (Other)         | 298 (15.0)     | 71 (12.3)               | 227 (16.1)             |

730

731

732 **Supplemental Table 1.** Cancer type was determined by the most commonly appearing cancer-

733 related diagnosis code prior to the baseline date. eGFR discrepancy is defined by an eGFR<sub>CYS</sub>

734 more than 30% lower than eGFR<sub>CRE</sub>.

735

736

737

738

739 **Supplemental Table 2. Predictors of eGFR<sub>CYS</sub> more than 30% lower than eGFR<sub>CRE</sub>**

| Covariates                   | eGFR <sub>CYS</sub> >30% lower than eGFR <sub>CRE</sub> |                   |                  |               |                   |                  |
|------------------------------|---------------------------------------------------------|-------------------|------------------|---------------|-------------------|------------------|
|                              | Univariable                                             |                   |                  | Multivariable |                   |                  |
|                              | OR                                                      | 95% CI            | p-value          | Adj OR        | 95% CI            | p-value          |
| <b>Age (per 10 years)</b>    | <b>1.12</b>                                             | <b>1.05, 1.20</b> | <b>0.001</b>     | 1.03          | 0.93, 1.13        | 0.60             |
| <b>Male Sex</b>              | 1.12                                                    | 0.93, 1.36        | 0.24             | 1.04          | 0.82, 1.31        | 0.77             |
| <b>White Race</b>            | 1.23                                                    | 0.97, 1.57        | 0.092            | 1.54          | 0.16, 2.05        | <b>0.003</b>     |
| <b>Body mass index</b>       |                                                         |                   |                  |               |                   |                  |
| Normal (18.5 - 24.9)         | REF                                                     | —                 |                  | —             | —                 |                  |
| Under weight (<18.5)         | <b>2.15</b>                                             | <b>1.21, 3.81</b> | <b>0.009</b>     | 1.80          | 0.91, 3.52        | 0.087            |
| Overweight (25 - 29.9)       | 0.99                                                    | 0.77, 1.27        | 0.918            | 1.29          | 0.95, 1.71        | 0.113            |
| Obese (≥ 30)                 | 1.03                                                    | 0.78, 1.36        | 0.846            | <b>1.51</b>   | <b>1.07, 2.13</b> | <b>0.018</b>     |
| <b>Smoking</b>               | <b>1.37</b>                                             | <b>1.12, 1.66</b> | <b>0.002</b>     | 0.90          | 0.71, 1.15        | 0.40             |
| <b>Comorbidities</b>         |                                                         |                   |                  |               |                   |                  |
| Hypertension                 | <b>2.04</b>                                             | <b>1.55, 2.70</b> | <b>&lt;0.001</b> | 0.97          | 0.66, 1.42        | 0.87             |
| Coronary Artery Disease      | <b>2.44</b>                                             | <b>2.00, 2.99</b> | <b>&lt;0.001</b> | 1.27          | 0.98, 1.66        | 0.075            |
| Diabetes Mellitus            | <b>2.73</b>                                             | <b>2.23, 3.35</b> | <b>&lt;0.001</b> | 1.28          | 0.99, 1.66        | 0.064            |
| Cirrhosis                    | <b>3.65</b>                                             | <b>2.45, 5.48</b> | <b>&lt;0.001</b> | <b>1.82</b>   | <b>1.14, 2.95</b> | <b>0.013</b>     |
| Human Immunodeficiency Virus | 0.78                                                    | 0.45, 1.28        | 0.336            |               |                   |                  |
| Malnutrition                 | <b>1.39</b>                                             | <b>1.06, 1.82</b> | <b>0.016</b>     | 0.93          | 0.67, 1.29        | 0.69             |
| Thyroid disease              | <b>1.46</b>                                             | <b>1.18, 1.81</b> | <b>&lt;0.001</b> | 1.16          | 0.89, 1.50        | 0.27             |
| <b>Medication Use*</b>       |                                                         |                   |                  |               |                   |                  |
| ACEi/ARB                     | 1.18                                                    | 0.97, 1.44        | 0.101            |               |                   |                  |
| Proton Pump Inhibitors       | <b>2.10</b>                                             | <b>1.69, 2.62</b> | <b>&lt;0.001</b> | 0.97          | 0.74, 1.28        | 0.83             |
| Diuretics                    | <b>3.36</b>                                             | <b>2.66, 4.27</b> | <b>&lt;0.001</b> | <b>1.68</b>   | <b>1.23, 2.30</b> | <b>0.001</b>     |
| Corticosteroids              | <b>3.66</b>                                             | <b>2.91, 4.61</b> | <b>&lt;0.001</b> | <b>1.70</b>   | <b>1.28, 2.24</b> | <b>&lt;0.001</b> |
| <b>Labs</b>                  |                                                         |                   |                  |               |                   |                  |
| eGFR <sub>CRE-CYS</sub>      | 0.98                                                    | 0.98, 0.98        | <b>&lt;0.001</b> | 0.99          | 0.99, 1.00        | <b>0.003</b>     |
| Albumin (g/dL)               |                                                         |                   |                  |               |                   |                  |
| ≥4.0                         | REF                                                     | —                 |                  | —             | —                 |                  |
| 3.0 to <4.0                  | <b>4.8</b>                                              | <b>3.77, 6.13</b> | <b>&lt;0.001</b> | <b>2.557</b>  | <b>1.93, 3.42</b> | <b>&lt;0.001</b> |
| <3.0                         | <b>12.1</b>                                             | <b>9.06, 16.2</b> | <b>&lt;0.001</b> | <b>5.48</b>   | <b>3.84, 7.86</b> | <b>&lt;0.001</b> |
| Hemoglobin (g/dL)            |                                                         |                   |                  |               |                   |                  |
| ≥12.0                        | REF                                                     | —                 |                  | —             | —                 |                  |
| 10.0 to <12.0                | <b>2.47</b>                                             | <b>1.88, 3.26</b> | <b>&lt;0.001</b> | <b>1.53</b>   | <b>1.12, 2.08</b> | <b>0.007</b>     |
| ≤10.0                        | <b>7.8</b>                                              | <b>6.08, 10.1</b> | <b>&lt;0.001</b> | <b>2.17</b>   | <b>1.55, 3.03</b> | <b>&lt;0.001</b> |

740 Supplemental Table 2. Univariable and multivariable logistic regression model. \*Chronic medication use  
741 was defined within 1 year prior to baseline; corticosteroid use was defined within 30 days of baseline. In  
742 all cases the population median was imputed for missing variables (Body mass index was missing for 479  
743 participants, serum albumin was missing for 72 participants, hemoglobin was missing for 46 participants).  
744 Abbreviations eGFR<sub>CRE-CYS</sub> = estimated Glomerular Filtration Rate calculated using the 2021 race-free  
745 combined serum creatinine and cystatin C equation, ACEi/ARB = Angiotensin Converting Enzyme  
746 Inhibitor/Angiotensin Receptor Blocker.  
747

748 **Supplemental Table 3. Characteristics of patients with severe eGFR discrepancy**

|                                           | <b>Overall</b> | <b>Severe eGFR discrepancy</b> |
|-------------------------------------------|----------------|--------------------------------|
| <b>Covariates</b>                         | N=1988         | N=139                          |
| <b>Age</b>                                | 66 (14)        | 68 (13)                        |
| <b>Female Sex</b>                         | 965 (48.5)     | 60 (43.2)                      |
| <b>Race/Ethnicity</b>                     |                |                                |
| White                                     | 1555 (78.2)    | 114 (82.0)                     |
| Black                                     | 184 (9.3)      | 10 (7.2)                       |
| Hispanic                                  | 89 (4.5)       | 6 (4.3)                        |
| Asian                                     | 72 (3.6)       | 4 (2.9)                        |
| Other                                     | 88 (4.4)       | 5 (3.6)                        |
| <b>Body Mass Index (kg/m<sup>2</sup>)</b> |                |                                |
| Underweight (<18.5)                       | 54 (3.6)       | 4 (4.6)                        |
| Normal (18.5 - 24.9)                      | 442 (29.4)     | 28 (32.2)                      |
| Overweight (25 - 29.9)                    | 515 (34.2)     | 26 (29.9)                      |
| Obese (≥30)                               | 493 (32.8)     | 29 (33.3)                      |
| <b>Comorbidities</b>                      |                |                                |
| Hypertension                              | 1600 (80.5)    | 124 (89.2)                     |
| Coronary Artery Disease                   | 987 (49.6)     | 99 (71.2)                      |
| Diabetes Mellitus                         | 1008 (50.7)    | 112 (80.6)                     |
| Cirrhosis                                 | 105 (5.3)      | 20 (14.4)                      |
| Human Immunodeficiency Virus              | 82 (4.1)       | 6 (4.3)                        |
| Smoking                                   | 806 (40.5)     | 67 (48.2)                      |
| Malnutrition                              | 275 (13.8)     | 21 (15.1)                      |
| <b>Medication Use</b>                     |                |                                |
| ACEi/ARB                                  | 1128 (56.7)    | 77 (55.4)                      |
| Proton Pump Inhibitors                    | 1291 (64.9)    | 115 (82.7)                     |
| Diuretics                                 | 1282 (64.5)    | 122 (87.8)                     |
| <b>Labs</b>                               |                |                                |
| <b>Serum Creatinine (mg/dL)</b>           | 1.62 (1.03)    | 1.56 (0.65)                    |
| <b>Serum Albumin (g/dL)</b>               |                |                                |
| <3.0                                      | 297 (15.5)     | 77 (55.4)                      |
| 3.0-3.49                                  | 187 (9.8)      | 27 (19.4)                      |
| 3.5-3.9                                   | 280 (14.6)     | 20 (14.4)                      |
| ≥4.0                                      | 1152 (60.1)    | 15 (10.8)                      |
| <b>Blood Urea Nitrogen (mg/dL)</b>        |                |                                |
| ≤17                                       | 501 (25.2)     | 4 (2.9)                        |
| 17-25                                     | 526 (26.5)     | 6 (4.3)                        |
| 25-39                                     | 482 (24.3)     | 30 (21.6)                      |
| >39                                       | 478 (24.1)     | 99 (71.2)                      |
| <b>Hemoglobin (g/dL)</b>                  |                |                                |
| ≤10.0                                     | 597 (30.0)     | 111 (79.9)                     |
| 10.0-11.9                                 | 505 (25.4)     | 18 (12.9)                      |
| ≥12.0                                     | 886 (44.6)     | 10 (7.2)                       |
| <b>Cancer types</b>                       |                |                                |
| Urothelial                                | 92 (4.6)       | 5 (3.6)                        |
| Brain                                     | 40 (2.0)       | 2 (1.4)                        |
| Breast                                    | 228 (11.5)     | 4 (2.9)                        |
| Gastrointestinal                          | 177 (8.9)      | 11 (7.9)                       |
| Gynecologic                               | 141 (7.1)      | 5 (3.6)                        |
| Head & Neck                               | 50 (2.5)       | 5 (3.6)                        |
| Leukemia                                  | 129 (6.5)      | 21 (15.1)                      |

|              |            |           |
|--------------|------------|-----------|
| Lymphoma     | 123 (6.2)  | 19 (13.7) |
| Melanoma     | 29 (1.5)   | 3 (2.2)   |
| Prostate     | 147 (7.4)  | 5 (3.6)   |
| Kidney       | 162 (8.1)  | 5 (3.6)   |
| Sarcoma      | 4 (0.2)    | 0 (0.0)   |
| Testicular   | 1 (0.1)    | 0 (0.0)   |
| Thoracic     | 114 (5.7)  | 17 (12.2) |
| Thyroid      | 43 (2.2)   | 4 (2.9)   |
| Skin (Other) | 298 (15.0) | 13 (9.4)  |

749  
750 **Supplemental Table 3.** Severe eGFR discrepancy was defined as eGFR<sub>CYS</sub> more than 50% lower than  
751 eGFR<sub>CRE</sub> and eGFR<sub>CYS</sub> < 30mL/min/1.73m<sup>2</sup>. Count and percent or mean and standard deviations are  
752 shown. Body mass index was missing for 479 participants, serum albumin was missing for 72  
753 participants, hemoglobin was missing for 46 participants. The remaining data was complete. The cohort  
754 median was imputed for missing data. Cancer type was determined by the most common cancer-related  
755 diagnosis code appearing prior to the baseline date. Abbreviations: eGFR = estimated glomerular filtration  
756 rate, ACEi/ARB = Angiotensin Converting Enzyme Inhibitor/Angiotensin Receptor Blocker.  
757  
758  
759  
760  
761  
762  
763  
764  
765  
766  
767  
768  
769  
770  
771  
772  
773  
774  
775  
776  
777  
778  
779  
780  
781  
782  
783  
784  
785  
786  
787  
788  
789  
790  
791

792

**Supplemental Table 4. Predictors of severe eGFR discrepancy**

| Covariates                   | Severe discrepancy group (N=139)<br>Vs. Reference group (N= 1409) |                   |                  |               |                   |                  |
|------------------------------|-------------------------------------------------------------------|-------------------|------------------|---------------|-------------------|------------------|
|                              | Univariable                                                       |                   |                  | Multivariable |                   |                  |
|                              | OR                                                                | 95% CI            | p-value          | Adj OR        | 95% CI            | p-value          |
| <b>Age (per 10 years)</b>    | <b>1.16</b>                                                       | <b>1.02, 1.32</b> | <b>0.031</b>     | 1.03          | 0.86, 1.25        | 0.743            |
| <b>Male Sex</b>              | 0.83                                                              | 0.58, 1.18        | 0.308            | 0.81          | 0.51, 1.29        | 0.38             |
| <b>White Race</b>            | 1.35                                                              | 0.87, 2.15        | 0.197            | 1.84          | <b>1.06, 3.29</b> | <b>0.033</b>     |
| <b>Body mass index</b>       |                                                                   |                   |                  |               |                   |                  |
| Normal weight                | REF                                                               | —                 |                  | —             | —                 |                  |
| Underweight                  | 1.52                                                              | 0.43, 4.20        | 0.463            | 1.18          | 0.26, 4.43        | 0.82             |
| Overweight                   | 1.19                                                              | 0.77, 1.89        | 0.446            | <b>2.22</b>   | <b>1.26, 4.01</b> | <b>0.007</b>     |
| Obese                        | 0.91                                                              | 0.53, 1.57        | 0.743            | <b>1.98</b>   | <b>0.99, 4.00</b> | <b>0.053</b>     |
| <b>Smoking</b>               | <b>1.50</b>                                                       | <b>1.05, 2.12</b> | <b>0.024</b>     | 0.77          | 0.48, 1.21        | 0.26             |
| <b>Comorbidities</b>         |                                                                   |                   |                  |               |                   |                  |
| Hypertension                 | <b>2.39</b>                                                       | <b>1.42, 4.31</b> | <b>0.002</b>     | 0.62          | 0.28, 1.40        | 0.24             |
| Coronary Artery Disease      | <b>3.24</b>                                                       | <b>2.23, 4.80</b> | <b>&lt;0.001</b> | 1.14          | 0.66, 1.98        | 0.64             |
| Diabetes Mellitus            | <b>5.36</b>                                                       | <b>3.53, 8.42</b> | <b>&lt;0.001</b> | 1.71          | 0.98, 3.02        | 0.061            |
| Cirrhosis                    | <b>5.21</b>                                                       | <b>2.92, 9.02</b> | <b>&lt;0.001</b> | <b>2.80</b>   | <b>1.31, 5.98</b> | <b>0.008</b>     |
| Human Immunodeficiency Virus | 0.98                                                              | 0.37, 2.13        | 0.963            |               |                   |                  |
| Malnutrition                 | 1.23                                                              | 0.74, 1.97        | 0.406            |               |                   |                  |
| Thyroid disease              | 1.70                                                              | 1.16, 2.45        | 0.005            | 1.17          | 0.90, 1.51        | 0.245            |
| <b>Medication Use*</b>       |                                                                   |                   |                  |               |                   |                  |
| ACEi/ARB                     | 0.99                                                              | 0.70, 1.41        | 0.968            |               |                   |                  |
| Proton Pump Inhibitors       | <b>3.15</b>                                                       | <b>2.04, 5.07</b> | <b>&lt;0.001</b> | 1.06          | 0.58, 1.98        | 0.85             |
| Diuretics                    | <b>5.34</b>                                                       | <b>3.27, 9.28</b> | <b>&lt;0.001</b> | 1.71          | 0.87, 3.50        | 0.13             |
| Corticosteroid use           | <b>6.67</b>                                                       | <b>4.62, 9.64</b> | <b>&lt;0.001</b> | <b>2.38</b>   | <b>1.49, 3.80</b> | <b>&lt;0.001</b> |
| <b>Baseline Labs</b>         |                                                                   |                   |                  |               |                   |                  |
| eGFR <sub>CRE-CYS</sub>      | 0.95                                                              | 0.94, 0.96        | <b>&lt;0.001</b> | 0.98          | 0.97, 0.99        | <b>&lt;0.001</b> |
| Albumin (g/dL)               |                                                                   |                   |                  |               |                   |                  |
| ≥4.0                         | REF                                                               | —                 |                  | —             | —                 |                  |
| 3.0-3.9                      | <b>12.7</b>                                                       | <b>7.13, 23.7</b> | <b>&lt;0.001</b> | <b>3.91</b>   | <b>2.00, 7.96</b> | <b>&lt;0.001</b> |
| <3.0                         | <b>54.4</b>                                                       | <b>31.0, 102</b>  | <b>&lt;0.001</b> | <b>12.3</b>   | <b>6.14, 26.0</b> | <b>&lt;0.001</b> |
| Hemoglobin (g/dL)            |                                                                   |                   |                  |               |                   |                  |
| ≥12.0                        | REF                                                               | —                 |                  | —             | —                 |                  |
| 10.0-11.9                    | <b>3.77</b>                                                       | <b>1.76, 8.57</b> | <b>&lt;0.001</b> | 1.50          | 0.64, 3.78        | 0.36             |
| ≤10.0                        | <b>31.3</b>                                                       | <b>17.0, 64.6</b> | <b>&lt;0.001</b> | <b>3.59</b>   | <b>1.64, 8.44</b> | <b>&lt;0.001</b> |

793  
794  
795  
796  
797  
798  
799  
800

Supplemental Table 4. Univariable and multivariable logistic regression model for severe group defined as eGFR<sub>CYS</sub> more than 50% lower than eGFR<sub>CRE</sub> and eGFR<sub>CYS</sub> <30 ml/min/1.73m<sup>2</sup>. \*Chronic medication use was defined within 1 year prior to baseline; corticosteroid use was defined within 30 days of baseline. Abbreviations: eGFR<sub>CRE-CYS</sub> = estimated Glomerular Filtration Rate calculated using the 2021 race-free combined serum creatinine and cystatin C equation, ACEi/ARB = Angiotensin Converting Enzyme Inhibitor/Angiotensin Receptor Blocker.



802 **Supplemental Table 5. Predictors of Vancomycin level > 30µg/dL**

| Covariates                | Predictors of Vancomycin level > 30µg/dL(N=55)<br>Vs. <30µg/dL (N=227) |                   |                  |               |                   |               |
|---------------------------|------------------------------------------------------------------------|-------------------|------------------|---------------|-------------------|---------------|
|                           | Univariable                                                            |                   |                  | Multivariable |                   |               |
|                           | OR                                                                     | 95% CI            | p-value          | Adj OR        | 95% CI            | p-value       |
| <b>Age (per 10 years)</b> | <b>0.79</b>                                                            | <b>0.65, 0.97</b> | <b>0.023</b>     | <b>0.73</b>   | <b>0.57, 0.93</b> | <b>0.010</b>  |
| Male Sex                  | 1.32                                                                   | 0.73, 2.38        | 0.36             | 1.47          | 0.64, 3.73        | 0.39          |
| White Race                | 1.54                                                                   | 0.71, 3.72        | 0.30             | 1.38          | 0.61, 3.48        | 0.460         |
| <b>eGFR discrepancy</b>   | <b>2.89</b>                                                            | <b>1.40, 6.58</b> | <b>0.006</b>     | <b>2.30</b>   | <b>1.05, 5.51</b> | <b>0.047</b>  |
| Body mass index           | 1.04                                                                   | 0.99, 1.09        | 0.096            | 1.04          | 0.98, 1.09        | 0.18          |
| Smoking                   | 0.91                                                                   | 0.50, 1.64        | 0.75             |               |                   |               |
| Comorbidities             |                                                                        |                   |                  |               |                   |               |
| Hypertension              | 1.41                                                                   | 0.60, 3.90        | 0.47             |               |                   |               |
| Coronary Artery Disease   | 1.27                                                                   | 0.67, 2.56        | 0.48             |               |                   |               |
| Diabetes Mellitus         | <b>3.28</b>                                                            | <b>1.36, 9.77</b> | <b>0.016</b>     | 2.38          | 0.91, 7.47        | 0.098         |
| Cirrhosis                 | 0.94                                                                   | 0.36, 2.16        | 0.89             |               |                   |               |
| Malnutrition              | 0.49                                                                   | 0.14, 1.30        | 0.19             |               |                   |               |
| Thyroid disease           | 0.86                                                                   | 0.44, 1.63        | 0.66             |               |                   |               |
| Medication Use*           |                                                                        |                   |                  |               |                   |               |
| ACEi/ARB                  | 0.96                                                                   | 0.53, 1.74        | 0.90             |               |                   |               |
| Proton Pump Inhibitors    | 1.27                                                                   | 0.53, 3.51        | 0.62             |               |                   |               |
| Diuretics                 | 1.76                                                                   | 0.76, 4.83        | 0.22             |               |                   |               |
| Corticosteroids           | <b>3.51</b>                                                            | <b>1.86, 7.03</b> | <b>&lt;0.001</b> | <b>2.91</b>   | <b>1.47, 6.02</b> | <b>0.0030</b> |
| Baseline Labs             |                                                                        |                   |                  |               |                   |               |
| eGFR <sub>CRE-CYS</sub>   | 0.99                                                                   | 0.98, 1.00        | 0.043            | 0.99          | 0.97, 1.00        | 0.032         |
| Albumin (g/dL)            |                                                                        |                   |                  |               |                   |               |
| ≥4.0                      | -                                                                      | -                 | -                |               |                   |               |
| 3.0 to <4.0               | 2.73                                                                   | 0.72, 17.9        | 0.20             |               |                   |               |
| <3.0                      | 3.05                                                                   | 0.85, 19.6        | 0.14             |               |                   |               |
| Hemoglobin (g/dL)         |                                                                        |                   |                  |               |                   |               |
| ≥12.0                     | -                                                                      | -                 | -                |               |                   |               |
| 10.0 to <12.0             | 2.57                                                                   | 0.40, 50.4        | 0.40             |               |                   |               |
| ≤10.0                     | 5.05                                                                   | 1.00, 92.1        | 0.12             |               |                   |               |

803  
804 Supplemental Table 5. Univariable and multivariable logistic regression model predicting Vancomycin  
805 trough level > 30 µg/dL. eGFR discrepancy defined as eGFR<sub>CYS</sub> > 30% lower than eGFR<sub>CRE</sub>.  
806 Abbreviations: eGFR<sub>CRE-CYS</sub> = estimated Glomerular Filtration Rate calculated using the 2021 race-free  
807 combined serum creatinine and cystatin C equation, ACEi/ARB = Angiotensin Converting Enzyme  
808 Inhibitor/Angiotensin Receptor Blocker.  
809

810 **Supplemental Table 6. Deidentified case summaries of clinical digoxin toxicity**

811

|                                                                                        |                                                                                                                                                                                                                                                                                                                                                                                                                                                  |
|----------------------------------------------------------------------------------------|--------------------------------------------------------------------------------------------------------------------------------------------------------------------------------------------------------------------------------------------------------------------------------------------------------------------------------------------------------------------------------------------------------------------------------------------------|
| 65-70-year-old woman with atrial fibrillation and congestive heart failure             | Admitted for hypercalcemia due to refractory multiple myeloma. She developed bradycardia with AV block, altered mental status, and hyperkalemia while on digoxin 0.25 mg daily, and her digoxin trough level was 3.8 ng/mL. She was treated with digoxin immune fab followed by improvement in bradycardia and mental status. Digoxin was permanently discontinued.                                                                              |
| 60-65-year-old woman with metastatic neuroendocrine cancer and carcinoid heart disease | Admitted for pulmonic and tricuspid valve replacement surgery and developed recurrent atrial flutter during a prolonged hospital stay. She was treated with digoxin load (0.25mg intravenous for 3 doses) followed by maintenance digoxin 0.125mg oral daily. On hospital day 83, she developed nausea and vomiting attributed to elevated digoxin (trough level was 2.1 ng/mL) and her symptoms fully resolved with discontinuation of digoxin. |

812  
813  
814  
815  
816  
817  
818  
819  
820  
821  
822  
823  
824  
825  
826  
827  
828  
829  
830  
831  
832  
833  
834  
835  
836  
837  
838  
839  
840  
841



842 **Supplemental Table 7. Predictors of 30-day mortality**

| Covariates                   | 30-day mortality |                   |                  |               |                   |                  |
|------------------------------|------------------|-------------------|------------------|---------------|-------------------|------------------|
|                              | Univariable      |                   |                  | Multivariable |                   |                  |
|                              | HR               | 95% CI            | p-value          | Adj HR        | 95% CI            | p-value          |
| <b>Age (per 10 years)</b>    | 1.01             | 0.89, 1.14        | 0.93             | 1.04          | 0.90, 1.18        | 0.614            |
| <b>Male Sex</b>              | 0.80             | 0.56, 1.13        | 0.20             | 1.22          | 0.85, 1.75        | 0.28             |
| <b>White Race</b>            | 1.60             | 0.99, 2.57        | 0.054            | <b>1.71</b>   | <b>1.04, 2.79</b> | <b>0.034</b>     |
| <b>Body mass index</b>       |                  |                   |                  |               |                   |                  |
| Normal (18.5 - 24.9)         | REF              | —                 |                  | —             | —                 |                  |
| Under weight (<18.5)         | 1.20             | 0.47, 3.07        | 0.70             | 0.97          | 0.37, 2.53        | 0.96             |
| Overweight (25 - 29.9)       | 0.96             | 0.64, 1.44        | 0.84             | 1.06          | 0.69, 1.62        | 0.80             |
| Obese (≥ 30)                 | <b>0.57</b>      | <b>0.33, 0.98</b> | <b>0.041</b>     | 1.15          | 0.66, 2.00        | 0.62             |
| <b>eGFR discrepancy</b>      | <b>7.57</b>      | <b>5.12, 11.2</b> | <b>&lt;0.001</b> | <b>1.97</b>   | <b>1.29, 3.01</b> | <b>0.002</b>     |
| <b>Smoking</b>               | 1.22             | 0.86, 1.71        | 0.26             |               |                   |                  |
| <b>Comorbidities</b>         |                  |                   |                  |               |                   |                  |
| Hypertension                 | 0.86             | 0.57, 1.31        | 0.49             |               |                   |                  |
| Coronary Artery Disease      | 2.10             | 1.46, 3.03        | <b>&lt;0.001</b> | 0.99          | 0.66, 1.51        | 0.98             |
| Diabetes Mellitus            | 2.46             | 1.68, 3.60        | <b>&lt;0.001</b> | 1.03          | 0.67, 1.59        | 0.89             |
| Cirrhosis                    | 2.70             | 1.62, 4.49        | <b>&lt;0.001</b> | 1.11          | 0.64, 1.93        | 0.70             |
| Human Immunodeficiency Virus | 1.11             | 0.49, 2.53        | 0.80             |               |                   |                  |
| Malnutrition                 | 0.61             | 0.34, 1.11        | 0.11             |               |                   |                  |
| Thyroid disease              | 1.27             | 0.87, 1.83        | 0.21             |               |                   |                  |
| <b>Medication Use*</b>       |                  |                   |                  |               |                   |                  |
| ACEi/ARB                     | <b>0.71</b>      | <b>0.50, 1.00</b> | <b>0.049</b>     | 0.90          | 0.60, 1.34        | 0.59             |
| Proton Pump Inhibitors       | <b>2.18</b>      | <b>1.42, 3.35</b> | <b>&lt;0.001</b> | 1.20          | 0.74, 1.94        | 0.47             |
| Diuretics                    | <b>2.00</b>      | <b>1.32, 3.04</b> | <b>0.001</b>     | 0.67          | 0.40, 1.11        | 0.12             |
| Corticosteroids              | <b>5.02</b>      | <b>3.56, 7.07</b> | <b>&lt;0.001</b> | <b>1.58</b>   | <b>1.09, 2.30</b> | <b>0.017</b>     |
| <b>Baseline Labs</b>         |                  |                   |                  |               |                   |                  |
| eGFR <sub>CRE-CYS</sub>      | <b>0.98</b>      | <b>0.97, 0.99</b> | <b>&lt;0.001</b> | <b>0.99</b>   | <b>0.98, 1.00</b> | <b>0.027</b>     |
| Albumin (g/dL)               |                  |                   |                  |               |                   |                  |
| ≥4.0                         | REF              | —                 |                  | —             | —                 |                  |
| 3.0 to <4.0                  | <b>16.3</b>      | <b>6.32, 42.0</b> | <b>&lt;0.001</b> | <b>7.17</b>   | <b>2.62, 19.6</b> | <b>&lt;0.001</b> |
| <3.0                         | <b>96.3</b>      | <b>39.2, 237</b>  | <b>&lt;0.001</b> | <b>31.8</b>   | <b>11.8, 86.2</b> | <b>&lt;0.001</b> |
| Hemoglobin (g/dL)            |                  |                   |                  |               |                   |                  |
| ≥12.0                        | REF              | —                 |                  | —             | —                 |                  |
| 10.0 to <12.0                | <b>6.10</b>      | <b>2.45, 15.2</b> | <b>&lt;0.001</b> | 2.00          | 0.77, 5.22        | 0.15             |
| ≤10.0                        | <b>28.8</b>      | <b>12.6, 65.5</b> | <b>&lt;0.001</b> | <b>2.93</b>   | <b>1.18, 7.25</b> | <b>0.020</b>     |

843  
844 Supplemental Table 7. Univariable and multivariable Cox model for 30-day mortality. eGFR discrepancy  
845 defined as eGFR<sub>CYS</sub> > 30% lower than eGFR<sub>CRE</sub>. \*Chronic medication use was defined within 1 year prior  
846 to baseline; corticosteroid use was defined within 30 days of baseline. In all cases the population median  
847 was imputed for missing variables (body mass index was missing for 479 participants, serum albumin was  
848 missing for 72 participants, hemoglobin was missing for 46 participants). Abbreviations: eGFR<sub>CRE-CYS</sub> =  
849 estimated Glomerular Filtration Rate calculated using the 2021 race-free combined serum creatinine and  
850 cystatin C equation, ACEi/ARB = Angiotensin Converting Enzyme Inhibitor/Angiotensin Receptor Blocker.  
851
